# Supplementary material for: Microwave assisted synthesis of cyclic carbonates from olefins with sodium bicarbonates as the C1 source
Source: Royal Society of Chemistry journal article supplement (doi:10.1039/c4cc00252k), 2014-01-01

## Supporting Information

for

*Microwave Assisted Synthesis of Cyclic Carbonates from Olefins with Sodium*

*Bicarbonates as the C1 Source*

Xiaoqing Yang,<sup>a,b</sup> Jie Wu,<sup>c</sup> Xianwen Mao,<sup>a</sup> Timothy F. Jamison\*<sup>c</sup> and T. Alan Hatton\*<sup>a</sup>

<sup>a</sup> *Department of Chemical Engineering, Massachusetts Institute of Technology,  
Cambridge, MA, 02139, USA*

<sup>b</sup> *College of Electronics and Information Engineering, Sichuan University, Chengdu,  
610065, CHINA*

<sup>c</sup> *Department of Chemistry, Massachusetts Institute of Technology, Cambridge, MA,  
02139, USA*

### Table of Contents:

|                                                                                |     |
|--------------------------------------------------------------------------------|-----|
| <i>General Experimental</i> .....                                              | S2  |
| <i>Representative Batch Procedure for Cyclic Carbonate Formation</i> .....     | S3  |
| <i>Representative Microwave Procedure for Cyclic Carbonate Formation</i> ..... | S3  |
| <i>Reaction Mechanism Analysis</i> .....                                       | S12 |
| <i><sup>1</sup>H and <sup>13</sup>C Spectra</i> .....                          | S14 |

## General Experimental Information:

All reactions in this project are not sensitive to air or moisture. Volumetric flasks were oven-dried and cooled in a desiccator prior to use. Anhydrous *N*-Bromosuccinimide (NBS), *N,N*-dimethylformamide (DMF), acetone and bicarbonates were purchased from Sigma-Aldrich and used without any further purification. All other commercial reagents or materials were used as received without purification: styrene (**1a**), 1-vinylnaphthalene (**1b**), 4-vinyanisole (**1c**), 4-acetoxystyrene (**1d**), 1-chloro-4-vinylbenzene (**1e**), 1-(trifluoromethyl)-3-vinylbenzene (**1f**), 4-fluorostyrene (**1g**), 3-vinylbenzaldehyde (**1h**), 1-octene (**1j**), hex-5-enenitrile (**1k**), methyl pent-4-enoate (**1l**), 4-penten-1-ol (**1m**), hex-5-en-1-ol (**1n**), hex-5-en-2-one (**1o**), allyl phenyl ether (**1p**), cyclopentene (**1q**) and *trans*-3-hexene (**1r**). Thin layer chromatography (TLC) was performed on DC-Fertigplatten SIL G-25 UV<sub>254</sub> pre-coated TLC plates. The developed chromatogram was visualized by UV lamp or stained using one of the following: aqueous potassium permanganate (KMnO<sub>4</sub>) or ethanolic *para*-anisaldehyde. Selected purifications were performed using a Biotage Isolera One flash purification system, as noted in the experimental procedures.

Proton nuclear magnetic resonance (<sup>1</sup>H NMR) and carbon nuclear magnetic resonance (<sup>13</sup>C NMR) spectra were recorded on a Varian Inova (500 MHz) spectrometers in deuteriochloroform (CDCl<sub>3</sub>) unless otherwise noted. Chemical shifts are recorded in parts per million (ppm) and are referenced to the centerline of deuteriochloroform (δ 7.24 ppm <sup>1</sup>H NMR; δ 77.0 ppm <sup>13</sup>C NMR). Data was recorded as follows: chemical shift, multiplicity (s = singlet, d = doublet, t = triplet, q = quartet, m = multiplet, br = broad). Coupling constants (*J* values) are given in Hertz (Hz). Infrared (IR) spectra were recorded on an Agilent Cary 630 FTIR. High resolution mass spectra (HRMS) were obtained on a Bruker Daltonics APEXIV 4.7 Tesla Fourier Transform Ion Cyclotron Resonance Mass Spectrometer (FT-ICR-MS) by Li Li of the Massachusetts Institute of Technology Department of Chemistry Instrumentation Facility.

## Representative Batch Procedure for Cyclic Carbonate Formation:

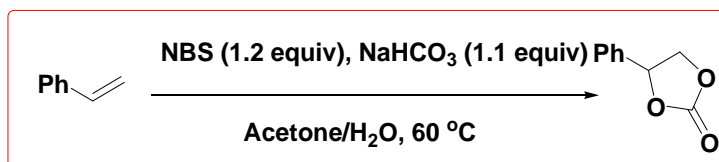

In a microwave-transparent tube (CEM Discover and Explorer SP 35ml tube) containing a stir bar, NBS (4.8 mmol, 1.2 equiv) was mixed with 4 mL of water and 4 mL of acetone immediately followed by the addition of sodium bicarbonate (4.4 mmol, 1.1 equiv) and styrene (4 mmol, 1 equiv). The tube was sealed and the reaction mixture was stirred and placed in oil bath. The temperature was maintained at 60 °C for 18 hours, and the mixture was cooled down to room temperature and depressurized. Ethyl acetate was used to extract any organic material. Further purification was performed using a Biotage Isolera One flash purification system to afford cyclic carbonate **2a** (360.9 mg, 55% yield).

## Representative Microwave Assisted Synthesis Procedure for Cyclic Carbonate Formation:

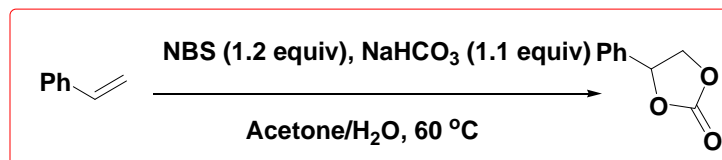

In a microwave-transparent tube (CEM Discover and Explorer SP 35ml tube) containing a stir bar, NBS (4.8 mmol, 1.2 equiv) was mixed with 4 mL of water and 4mL of acetone followed by the addition of sodium bicarbonate (4.4 mmol, 1.1 equiv) and styrene (4 mmol, 1 equiv). The tube was put into the CEM Discover and Explorer SP reactor. The temperature measured by the fiber optic sensor was set up at rising from 24°C to 60 °C in 10 minutes and maintained at 60 °C in 17 hours and 50 minutes. The reactor was cooled down to room temperature and depressurized. Ethyl acetate was used to extract any organic material. Further purification was performed using a

Biotage Isolera One flash purification system to afford cyclic carbonate **2a** (564.3 mg, 86% yield).

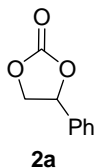

#### 4-Phenyl-1,3-dioxolan-2-one (**2a**)

Styrene (458  $\mu$ L, 4 mmol) was added according to the representative microwave procedure. Following the general procedure, compound **2a** was isolated and analysis of the final sample indicated 86% yield (564.3 mg). IR (neat): 1784, 1670, 1160, 1050  $\text{cm}^{-1}$ .  $^1\text{H}$  NMR (500 MHz,  $\text{CDCl}_3$ ):  $\delta$  7.44-7.36 (m, 3H), 7.36-7.28 (m, 2H), 5.64 (t,  $J = 8.0$  Hz, 1H), 4.78 (t,  $J = 8.4$  Hz, 1H), 4.30 (dd,  $J = 8.6, 7.9$  Hz, 1H).  $^{13}\text{C}$  NMR (125 MHz,  $\text{CDCl}_3$ ):  $\delta$  154.9, 135.8, 129.8, 129.3, 125.9, 78.0, 71.2. HRMS (DART)  $m/z$  calcd for  $\text{C}_9\text{H}_{12}\text{NO}_3$   $[\text{M}+\text{NH}_4]^+$ : 182.0812. Found: 182.0810.

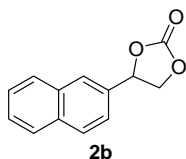

#### 4-(Naphthalen-2-yl)-1,3-dioxolan-2-one (**2b**)

1-Vinylnaphthalene (0.616g, 4 mmol) was added according to the representative microwave procedure. Following the general procedure, compound **2b** was isolated and analysis of the final sample indicated 74% yield (633.6mg). IR (neat): 2925, 2855, 1795, 1712, 1165, 1058  $\text{cm}^{-1}$ .  $^1\text{H}$  NMR (500 MHz,  $\text{CDCl}_3$ ):  $\delta$  7.88 (d,  $J = 8.5$  Hz, 1H), 7.83 (m, 3H), 7.53 (m, 2H), 7.39 (dd,  $J = 8.4$  Hz, 2H, 1H), 5.79 (t,  $J = 8.0$  Hz, 1H), 4.82 (t,  $J = 8.5$  Hz, 1H), 4.38 (t,  $J = 8.0$  Hz, 1H).  $^{13}\text{C}$  NMR (125 MHz,  $\text{CDCl}_3$ ): 154.9, 133.5, 132.8, 132.8, 129.4, 128.0, 127.7, 127.0, 126.9, 125.7, 122.3, 78.1, 71.0. HRMS (DART)  $m/z$  calcd for  $\text{C}_{13}\text{H}_{11}\text{O}_3$   $[\text{M}+\text{H}]^+$ : 215.0708. Found: 215.0704.

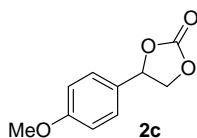

#### 4-(4-Methoxyphenyl)-1,3-dioxolan-2-one (2c)

4-Vinylanisole (532  $\mu$ L, 4 mmol) was added according to the representative microwave procedure. Following the general procedure, compound **2c** was isolated and analysis of the final sample indicated 68% yield (527.8mg). IR (solid film): 2962, 2925, 1783, 1250, 1161, 1050  $\text{cm}^{-1}$ .  $^1\text{H}$  NMR (500 MHz,  $\text{CDCl}_3$ ): 7.28 (m, 2H), 6.93 (m, 2H), 5.60 (t,  $J=8.0$  Hz, 1H), 4.73 (dd,  $J=8.5, 8.0$  Hz, 1H), 4.32 (t,  $J=8.0$  Hz, 1H), 3.80 (s, 3H).  $^{13}\text{C}$  NMR (125 MHz,  $\text{CDCl}_3$ ): 160.7, 154.9, 127.8, 127.3, 114.5, 78.1, 71.1, 55.4. HRMS (DART)  $m/z$  calcd for  $\text{C}_{10}\text{H}_{14}\text{NO}_4$   $[\text{M}+\text{NH}_4]^+$ : 212.0923. Found: 212.0918.

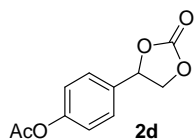

#### 4-(2-Oxo-1,3-dioxolan-4-yl)phenyl acetate (2d)

4-Acetoxystyrene (612  $\mu$ L, 4 mmol) was added according to the representative microwave procedure. Following the general procedure, compound **2d** was isolated and analysis of the final sample indicated 82% yield (728.3mg). IR (solid film): 1781, 1748, 1510, 1370, 1193, 1157, 1068, 1012  $\text{cm}^{-1}$ .  $^1\text{H}$  NMR (500 MHz,  $\text{CDCl}_3$ ): 7.28 (d,  $J=9$  Hz, 2H), 6.93 (d,  $J=9$  Hz, 2H), 5.60 (t,  $J=8.0$  Hz, 1H), 4.73 (dd,  $J=9.0, 8.5$  Hz, 1H), 4.33 (dd,  $J=8.5, 8.0$  Hz, 1H), 3.81 (s, 3H).  $^{13}\text{C}$  NMR (125 MHz,  $\text{CDCl}_3$ ): 169.1, 154.6, 151.3, 133.1, 127.1, 121.3, 77.3, 70.9, 20.9. HRMS (DART)  $m/z$  calcd for  $\text{C}_{11}\text{H}_{14}\text{NO}_5$   $[\text{M}+\text{NH}_4]^+$ : 240.0872. Found: 240.0863.

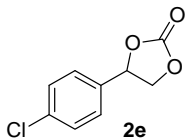

#### 4-(3-Chlorophenyl)-1,3-dioxolan-2-one (2e)

1-Chloro-4-vinylbenzene (480  $\mu$ L, 4 mmol) was added according to the representative microwave procedure. Following the general procedure, compound **2e** was isolated and analysis of the final sample indicated 78% yield (617.8mg). IR (solid film): 3577, 2966, 2126, 1789, 1489, 1162, 1048, 955  $\text{cm}^{-1}$ .  $^1\text{H}$  NMR (500 MHz,  $\text{CDCl}_3$ ):  $\delta$  7.37 (m, 2H), 7.26 (m, 2H), 5.64 (t,  $J$  = 8.0 Hz, 1H), 4.78 (t,  $J$  = 8.0 Hz, 1H), 4.27 (t,  $J$  = 8.0 Hz, 1H).  $^{13}\text{C}$  NMR (125MHz,  $\text{CDCl}_3$ ):  $\delta$  154.5, 135.5, 134.2, 129.3, 127.2, 77.2, 70.9. HRMS (DART)  $m/z$  calcd for  $\text{C}_9\text{H}_8\text{ClO}_3$   $[\text{M}+\text{H}]^+$ : 199.0162. Found: 199.0156.

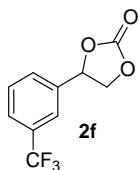

#### 4-(3-(Trifluoromethyl)phenyl)-1,3-dioxolan-2-one (**2f**)

1-(Trifluoromethyl)-3-vinylbenzene (592  $\mu$ L, 4 mmol) was added according to the representative microwave procedure and DMF/ $\text{H}_2\text{O}$  as co-solvent instead of acetone/ $\text{H}_2\text{O}$  to improve the reaction conversion. Following the general procedure, compound **2f** was isolated and analysis of the final sample indicated 70% yield (649.7mg). IR (solid film): 2923, 1793, 1326, 1066, 902  $\text{cm}^{-1}$ .  $^1\text{H}$  NMR (500 MHz,  $\text{CDCl}_3$ ):  $\delta$  7.67(d,  $J$  = 7.0Hz, 1H), 7.56 (m, 3H), 5.74(t,  $J$  = 8.0 Hz, 1H), 4.85(t,  $J$  = 8.5 Hz, 1H), 4.31 (t,  $J$  = 8.0 Hz, 1H).  $^{13}\text{C}$  NMR (125 MHz,  $\text{CDCl}_3$ ):  $\delta$  154.4, 136.9, 131.6 (q), 129.9, 129.0, 126.4, 123.5 (q), 122.6, 77.1, 70.9 (q). HRMS (DART)  $m/z$  calcd for  $\text{C}_{10}\text{H}_7\text{F}_3\text{NaO}_3$   $[\text{M}+\text{Na}]^+$ : 255.0245. Found: 255.0255.

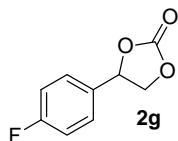

#### 4-(4-Fluorophenyl)-1,3-dioxolan-2-one (**2g**)

4-Fluorostyrene (475  $\mu$ L, 4 mmol) was added according to the representative microwave procedure. Following the general procedure, compound **2g** was isolated and analysis of the final sample indicated 69% yield (502.4mg). IR (solid film): 1780,

1602, 1507, 1329, 1215, 1158, 1052  $\text{cm}^{-1}$ .  $^1\text{H}$  NMR (500 MHz,  $\text{CDCl}_3$ ):  $\delta$  7.33 (m, 2H), 7.08 (m, 2H), 5.64 (t,  $J = 8.5$  Hz, 1H), 4.77 (t,  $J = 8.5$  Hz, 1H), 4.28 (t,  $J = 8.5$  Hz, 1H).  $^{13}\text{C}$  NMR (125 MHz,  $\text{CDCl}_3$ ):  $\delta$  164.2, 162.2, 154.6, 131.5, 128.0, 116.2, 77.4, 71.0. HRMS (DART)  $m/z$  calcd for  $\text{C}_9\text{H}_{11}\text{FNO}_3$   $[\text{M}+\text{NH}_4]^+$ : 200.0723. Found: 200.0707.

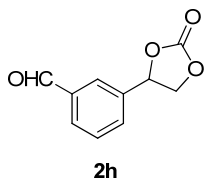

### 3-(2-Oxo-1,3-dioxolan-4-yl)benzaldehyde (2h)

3-Vinylbenzaldehyde (505  $\mu\text{L}$ , 4 mmol) was added according to the representative microwave procedure. Following the general procedure, compound **2h** was isolated and analysis of the final sample indicated 63% yield (483.9mg). IR (solid film): 1791, 1696, 1607, 1381, 1161, 1068  $\text{cm}^{-1}$ .  $^1\text{H}$  NMR (500 MHz,  $\text{CDCl}_3$ ):  $\delta$  10.03 (s, 1H), 7.92 (m, 2H), 7.87 (s, 2H), 5.76 (t,  $J = 8.5$  Hz, 1H), 4.86 (dd,  $J = 8.5, 8.0$  Hz, 1H), 4.34 (dd,  $J = 9.0, 8.0$  Hz, 1H).  $^{13}\text{C}$  NMR (125 MHz,  $\text{CDCl}_3$ ):  $\delta$  191.4, 154.4, 137.1, 136.8, 131.5, 131.0, 130.0, 126.4, 77.3, 70.9. HRMS (DART)  $m/z$  calcd for  $\text{C}_{10}\text{H}_9\text{O}_4$   $[\text{M}+\text{H}]^+$ : 193.0501. Found: 193.0504.

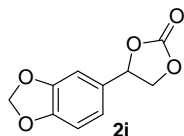

### 4-(Benzo[d][1,3]dioxol-5-yl)-1,3-dioxolan-2-one (2i)

5-Vinylbenzo[d][1,3]dioxole (0.592 g, 4 mmol) was added according to the representative microwave procedure. Following the general procedure, compound **2i** was isolated and analysis of the final sample indicated 52% yield (433.5mg). IR (solid film): 2920, 1787, 1447, 1247, 1162, 1033, 923  $\text{cm}^{-1}$ .  $^1\text{H}$  NMR (500 MHz,  $\text{CDCl}_3$ ):  $\delta$  6.8 (m, 3H), 5.96 (s, 2H), 5.55 (t,  $J = 8.0$  Hz, 1H), 4.71 (t,  $J = 8.5$  Hz, 1H), 4.27 (t,  $J = 8.5$  Hz, 1H).  $^{13}\text{C}$  NMR (125 MHz,  $\text{CDCl}_3$ ):  $\delta$  154.7, 148.7, 148.4, 129.1,

120.4, 108.5, 106.1, 101.5, 78.1, 71.0. HRMS (DART)  $m/z$  calcd for  $C_{10}H_9O_5$   $[M+H]^+$ : 209.0450. Found: 209.0447.

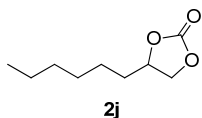

#### 4-Hexyl-1,3-dioxolan-2-one (**2j**)

1-Octene (1.56 mL, 10 mmol, 1 equiv) was added according to the representative microwave procedure. Following the general procedure, compound **2j** was isolated and analysis of the final sample indicated 69% yield (320.3mg). IR (neat): 2928, 2859, 1788, 1384, 1165, 1059, 774  $cm^{-1}$ .  $^1H$  NMR (500 MHz,  $CDCl_3$ ):  $\delta$  4.67 (dd,  $J = 7.5, 5.5$  Hz, 1H), 4.50 (t,  $J = 8.1$  Hz, 1H), 4.04 (dd,  $J = 8.3, 7.3$  Hz, 1H), 1.79-1.73 (m, 1H), 1.68-1.61 (m, 1H), 1.45-1.27 (m, 8H), 0.86 (t,  $J = 6.9$  Hz, 3H).  $^{13}C$  NMR (125 MHz,  $CDCl_3$ ):  $\delta$  155.1, 77.1, 69.4, 33.9, 31.5, 28.8, 24.3, 22.5. HRMS (DART)  $m/z$  calcd for  $C_9H_{20}NO_3$   $[M+NH_4]^+$ : 190.1438. Found: 190.1438.

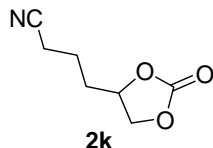

#### 4-(2-Oxo-1,3-dioxolan-4-yl)butanenitrile (**2k**)

Hex-5-enenitrile (454  $\mu$ L, 4 mmol) was added according to the representative microwave procedure. Following the general procedure, compound **2k** was isolated and analysis of the final sample indicated 83% yield (514.8mg). IR (solid film): 2927, 2247, 1781, 1390, 1164, 1057  $cm^{-1}$ .  $^1H$  NMR (500 MHz,  $CDCl_3$ ):  $\delta$  4.71 (m, 1H), 4.55 (t,  $J = 8.5$  Hz, 1H), 4.06 (t,  $J = 7.0$  Hz, 1H), 2.42 (m, 2H), 1.85 (m, 3H), 1.74 (m, 1H).  $^{13}C$  NMR (125 MHz,  $CDCl_3$ ):  $\delta$  154.6, 118.9, 75.9, 69.0, 32.5, 20.8, 16.6. HRMS (DART)  $m/z$  calcd for  $C_7H_{10}NO_3$   $[M+H]^+$ : 156.0661. Found: 156.0661.



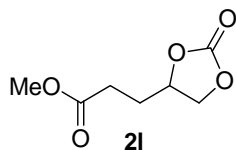

#### Methyl 3-(2-oxo-1,3-dioxolan-4-yl)propanoate (**2l**)

Methyl pent-4-enoate (0.456 g, 4 mmol) was added according to the representative microwave procedure. Following the general procedure, compound **2l** was isolated and analysis of the final sample indicated 85% yield (591.8mg). IR (solid film): 1786, 1729, 1360, 1158, 1059, 980  $\text{cm}^{-1}$ .  $^1\text{H}$  NMR (300 MHz,  $\text{CDCl}_3$ ):  $\delta$  4.77 (m, 1H), 4.54 (t,  $J = 8.1$  Hz, 1H), 4.07 (dd,  $J = 6.9, 15.6$  Hz, 1H), 3.67 (s, 3H), 2.51 (m, 2H), 2.03 (m, 2H).  $^{13}\text{C}$  NMR (125 MHz,  $\text{CDCl}_3$ ):  $\delta$  172.4, 154.6, 75.8, 69.2, 51.8, 28.9. HRMS (DART)  $m/z$  calcd for  $\text{C}_7\text{H}_{14}\text{NO}_5$   $[\text{M}+\text{NH}_4]^+$ : 192.0872. Found: 192.0855.

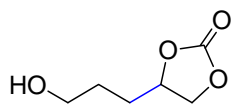

#### 4-(3-Hydroxypropyl)-1,3-dioxolan-2-one (**2m**)

4-Penten-1-ol (395  $\mu\text{L}$ , 4 mmol) was added according to the representative microwave procedure. Following the general procedure, compound **2m** was isolated and analysis of the final sample indicated 65% yield (379.8mg). IR (solid film): 2922, 1780, 1707, 1388, 1171, 1053  $\text{cm}^{-1}$ .  $^1\text{H}$  NMR (500 MHz,  $\text{CDCl}_3$ ): 4.77 (m, 1H), 4.55 (t,  $J = 8.0$  Hz, 1H), 4.09 (t,  $J = 7.0$  Hz, 1H), 3.71 (m, 2H), 1.87 (m, 2H), 1.68 (m, 2H).  $^{13}\text{C}$  NMR (125 MHz,  $\text{CDCl}_3$ ): 155.0, 76.9, 69.4, 61.7, 30.6, 27.4. HRMS (DART)  $m/z$  calcd for  $\text{C}_6\text{H}_{14}\text{NO}_4$   $[\text{M}+\text{NH}_4]^+$ : 164.0923. Found: 164.0926.

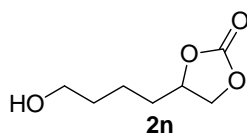

#### 4-(4-Hydroxybutyl)-1,3-dioxolan-2-one (**2n**)

Hex-5-en-1-ol (480  $\mu$ L, 4 mmol) was added according to the representative microwave procedure. Following the general procedure, compound **2n** was isolated and analysis of the final sample indicated 84% yield (537.8mg). IR (solid film): 3414, 2932, 2868, 1775, 1165, 1055  $\text{cm}^{-1}$ .  $^1\text{H}$  NMR (500 MHz,  $\text{CDCl}_3$ ): 4.70 (m, 1H), 4.51(t,  $J = 8.0$  Hz, 1H), 4.06 (t,  $J = 7.0$  Hz, 1H), 3.64 (t,  $J = 5.5$  Hz, 2H), 1.81 (m, 1H), 1.73 (m, 1H), 1.64 (br, 1H), 1.56(m, 3H), 1.46(m, 1H).  $^{13}\text{C}$  NMR (125 MHz,  $\text{CDCl}_3$ ):155.2, 77.0, 69.3, 61.9, 33.4, 31.8, 20.7. HRMS (DART)  $m/z$  calcd for  $\text{C}_7\text{H}_{16}\text{NO}_4$   $[\text{M}+\text{NH}_4]^+$ : 178.1079. Found: 178.1070.

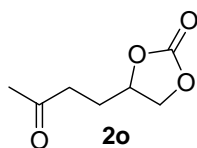

#### 4-(3-Oxobutyl)-1,3-dioxolan-2-one (**2o**)

Hex-5-en-2-one (480 mL, 4 mmol) was added according to the representative microwave procedure. Following the general procedure, compound **2o** was isolated and analysis of the final sample indicated 83% yield (524.8mg). IR (solid film): 2920, 1782, 1394, 1159, 1055  $\text{cm}^{-1}$ .  $^1\text{H}$  NMR (500 MHz,  $\text{CDCl}_3$ ):  $\delta$  4.72 (m, 1H), 4.52 (dd,  $J = 8.5, 8.0$  Hz, 1H), 4.04 (dd,  $J = 9.0, 7.0$  Hz, 1H), 2.64 (t,  $J = 7.0$ Hz, 2H), 2.14 (s, 3H), 2.01 (m, 1H), 1.87 (m, 1H).  $^{13}\text{C}$  NMR (125 MHz,  $\text{CDCl}_3$ ):  $\delta$  206.8, 154.7, 76.0, 69.4, 38.0, 29.9, 27.6. HRMS (DART)  $m/z$  calcd for  $\text{C}_7\text{H}_{14}\text{NO}_4$   $[\text{M}+\text{NH}_4]^+$ : 176.0923. Found: 176.0914.

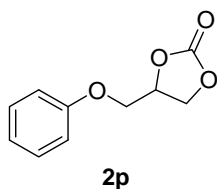

#### 4-(Phenoxymethyl)-1,3-dioxolan-2-one (**2p**)

Allyl phenyl ether (545  $\mu$ L, 4 mmol) was added according to the representative microwave procedure and DMF/ $\text{H}_2\text{O}$  as co-solvent instead of acetone/ $\text{H}_2\text{O}$  to improve the reaction conversion. Following the general procedure, compound **2p** was

isolated and analysis of the final sample indicated 55% yield (426.9mg). IR (solid film): 2927, 1783, 1600, 1490, 1396, 1161, 1081, 1009  $\text{cm}^{-1}$ .  $^1\text{H}$  NMR (500 MHz,  $\text{CDCl}_3$ ):  $\delta$  7.34-7.20 (m, 2H), 7.03-6.94 (m, 1H), 6.93-6.82 (m, 2H), 5.04-4.98 (m, 1H), 4.60 (t,  $J$  = 8.4 Hz, 1H), 4.51 (dd,  $J$  = 8.5, 5.9, 1H), 4.21 (dd,  $J$  = 10.6, 4.2 Hz, 1H), 4.12 (dd,  $J$  = 10.6, 3.6 Hz, 1H).  $^{13}\text{C}$  NMR (125 MHz,  $\text{CDCl}_3$ ):  $\delta$  157.8, 154.7, 129.7, 122.0, 114.6, 74.1, 66.9, 66.3. HRMS (DART)  $m/z$  calcd for  $\text{C}_{10}\text{H}_{14}\text{NO}_4$   $[\text{M}+\text{NH}_4]^+$ : 212.0917. Found: 212.0916.

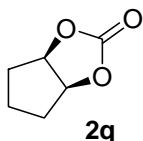

***Cis*-hexahydrobenzo[d][1,3]dioxol-2-one (2q)**

Cyclopentene (404  $\mu\text{L}$ , 4 mmol) was added according to the representative microwave procedure. Following the general procedure, compound 2q was isolated and analysis of the final sample indicated 49% yield (251.0mg). IR (solid film): 2970, 1784, 1717, 1373, 1165, 1043, 929  $\text{cm}^{-1}$ .  $^1\text{H}$  NMR (500 MHz,  $\text{CDCl}_3$ ): 5.08 (dd,  $J$  = 4.0, 2.0 Hz, 1H), 2.14 (m, 2H), 1.78 (m, 2H), 1.64 (m, 2H).  $^{13}\text{C}$  NMR (125 MHz,  $\text{CDCl}_3$ ): 155.4, 81.8, 33.2, 21.5. HRMS (DART)  $m/z$  calcd for  $\text{C}_6\text{H}_{12}\text{NO}_3$   $[\text{M}+\text{NH}_4]^+$ : 146.0817. Found: 146.0817.

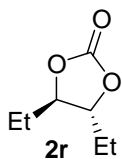

***trans*-4,5-Diethyl-1,3-dioxolan-2-one (2r)**

*trans*-3-Hexene (480 mL, 4 mmol) was added according to the representative microwave procedure. Following the general procedure, compound 2r was isolated and analysis of the final sample indicated 86% yield (495.6mg). IR (solid film): 2936, 2864, 1786, 1200, 1052, 965  $\text{cm}^{-1}$ .  $^1\text{H}$  NMR (500 MHz,  $\text{CDCl}_3$ ):  $\delta$  4.10 (s, 2H), 1.88 (m, 2H), 1.75 (m, 2H), 1.63 (m, 2H), 1.5 (m, 3H), 1.38 (m, 1H).  $^{13}\text{C}$  NMR (125 MHz,

CDCl<sub>3</sub>):  $\delta$  154.6, 83.2, 74.4, 35.4, 24.4, 22.2. HRMS (DART)  $m/z$  calcd for C<sub>8</sub>H<sub>13</sub>O<sub>3</sub> [M+NH<sub>4</sub>]<sup>+</sup>: 157.0865. Found: 157.0859.

## Experiments of Reaction Mechanism Analysis

In order to understand the reaction process, we investigated the product distribution at different time and temperature scales. The experiment results were summarized Table S1 and Table S2.

Table S1 The influence of reaction time (in Acetone/H<sub>2</sub>O, 60 °C)

| Entry | Condition | Time    | Product Yield                                                                     |                                                                                   |                                                                                     |                                                                                     |
|-------|-----------|---------|-----------------------------------------------------------------------------------|-----------------------------------------------------------------------------------|-------------------------------------------------------------------------------------|-------------------------------------------------------------------------------------|
|       |           |         | 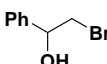 |  |  |  |
| A1    | Microwave | 10min   | 73%                                                                               | 15%                                                                               | 9%                                                                                  | 0%                                                                                  |
| A2    | Oil bath  | 10min   | 95%                                                                               | 0%                                                                                | 0%                                                                                  | 0%                                                                                  |
| B1    | Microwave | 30min   | 51%                                                                               | 28%                                                                               | 20%                                                                                 | 0%                                                                                  |
| B2    | Oil bath  | 30min   | 63%                                                                               | 23%                                                                               | 11%                                                                                 | 0%                                                                                  |
| C1    | Microwave | 60min   | 10%                                                                               | 40%                                                                               | 48%                                                                                 | 0%                                                                                  |
| C2    | Oil bath  | 60min   | 33%                                                                               | 41%                                                                               | 24%                                                                                 | 0%                                                                                  |
| D1    | Microwave | 180min  | 5%                                                                                | 30%                                                                               | 62%                                                                                 | 0%                                                                                  |
| D2    | Oil bath  | 180min  | 8%                                                                                | 47%                                                                               | 36%                                                                                 | 0%                                                                                  |
| E1    | Microwave | 450min  | 0%                                                                                | 11%                                                                               | 78%                                                                                 | 0%                                                                                  |
| E2    | Oil bath  | 450min  | 0%                                                                                | 45%                                                                               | 37%                                                                                 | 5%                                                                                  |
| F1    | Microwave | 1080min | 0%                                                                                | 0%                                                                                | 86%                                                                                 | 0%                                                                                  |
| F2    | Oil bath  | 1080min | 0%                                                                                | 31%                                                                               | 48%                                                                                 | 12%                                                                                 |

|          |                       |        |      |     |    |    |
|----------|-----------------------|--------|------|-----|----|----|
| <b>G</b> | No heating<br>(24 °C) | 360min | 85%  | 10% | 3% | 0% |
| <b>H</b> | No heating<br>(24 °C) | 30min  | 100% | 0%  | 0% | 0% |

Table S2 The influence of reaction temperature (in DMF/H<sub>2</sub>O, 60 min)

| Entry    | Condition  | Temp.  | Product Yield                                                                     |                                                                                     |                                                                                     |
|----------|------------|--------|-----------------------------------------------------------------------------------|-------------------------------------------------------------------------------------|-------------------------------------------------------------------------------------|
|          |            |        | 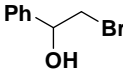 |  |  |
| <b>A</b> | Microwave  | 30 °C  | 89%                                                                               | 5%                                                                                  | 6%                                                                                  |
| <b>B</b> | Microwave  | 60 °C  | 20%                                                                               | 29%                                                                                 | 45%                                                                                 |
| <b>C</b> | Microwave  | 60 °C  | 20%                                                                               | 29%                                                                                 | 45%                                                                                 |
| <b>D</b> | Microwave  | 80 °C  | 10%                                                                               | 10%                                                                                 | 65%                                                                                 |
| <b>E</b> | Microwave  | 100 °C | 20%                                                                               | 0%                                                                                  | 70%                                                                                 |
| <b>F</b> | No heating | 24 °C  | 0%                                                                                | 60%                                                                                 | 0%                                                                                  |

**$^1\text{H}$  and  $^{13}\text{C}$  NMR Spectra:**

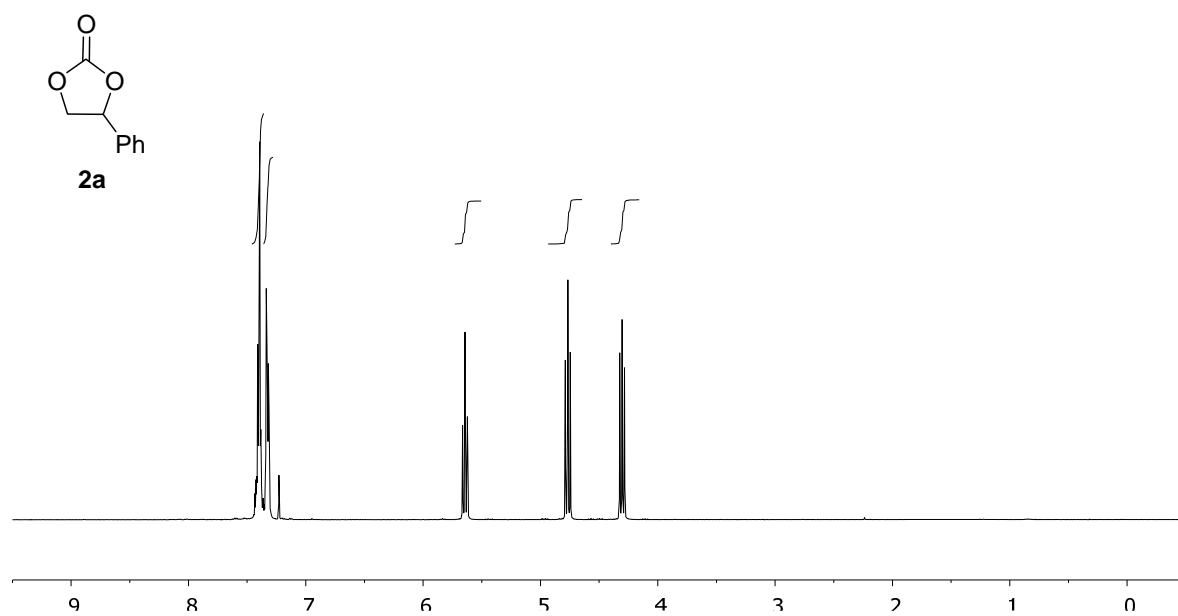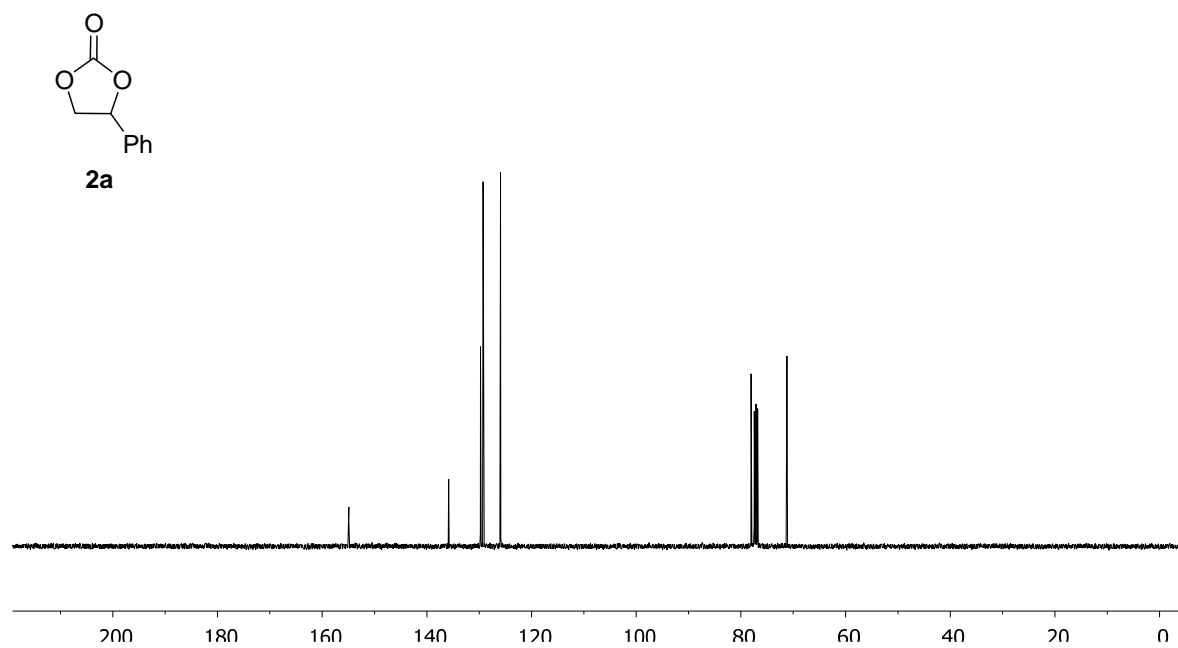

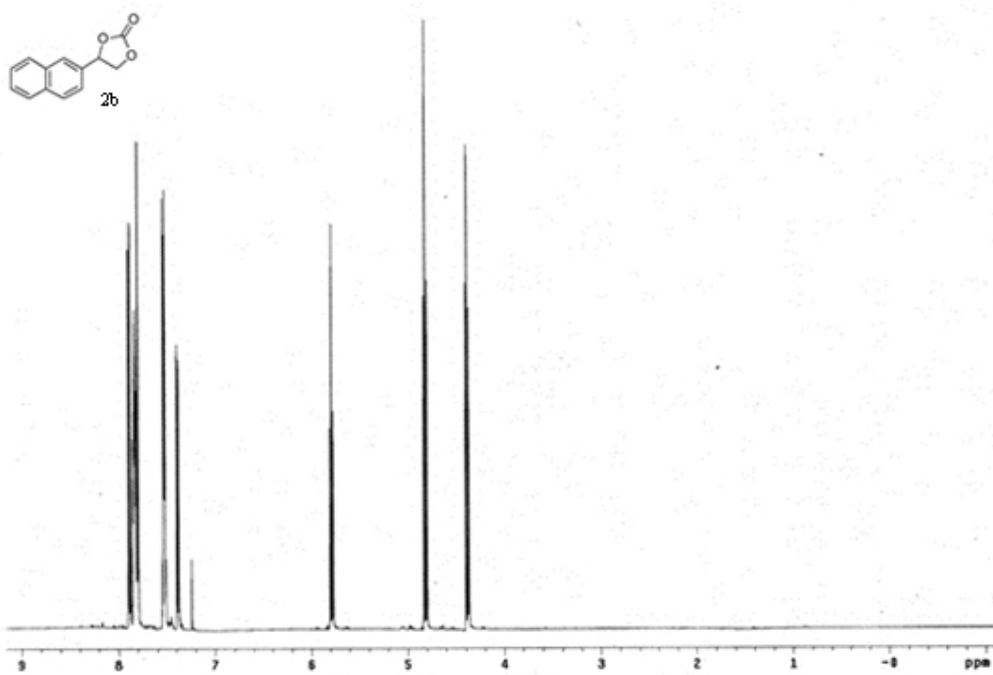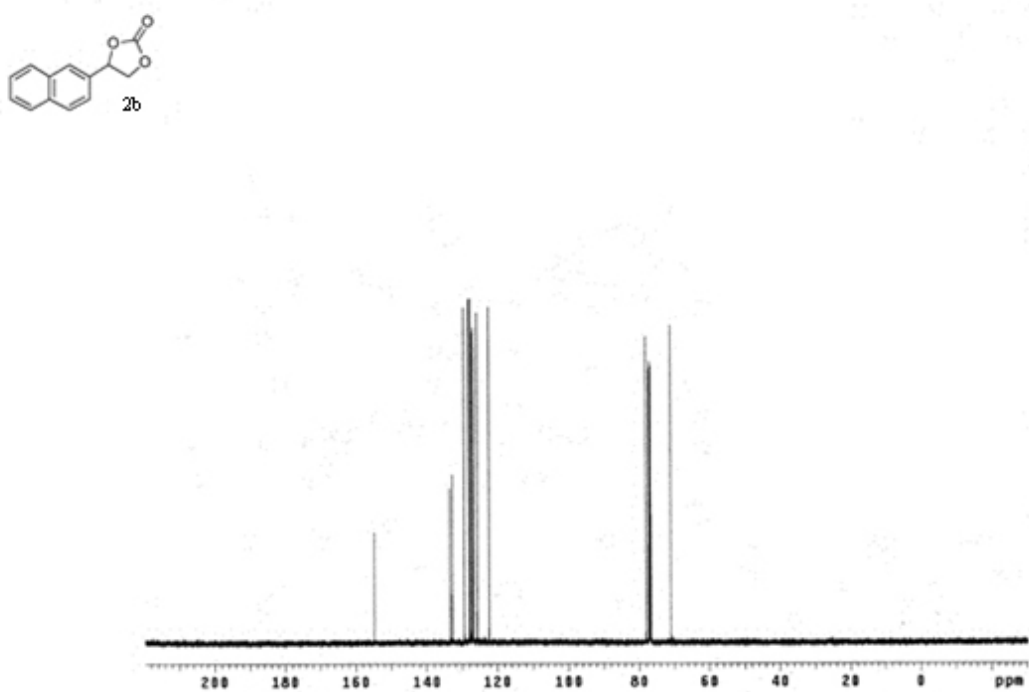

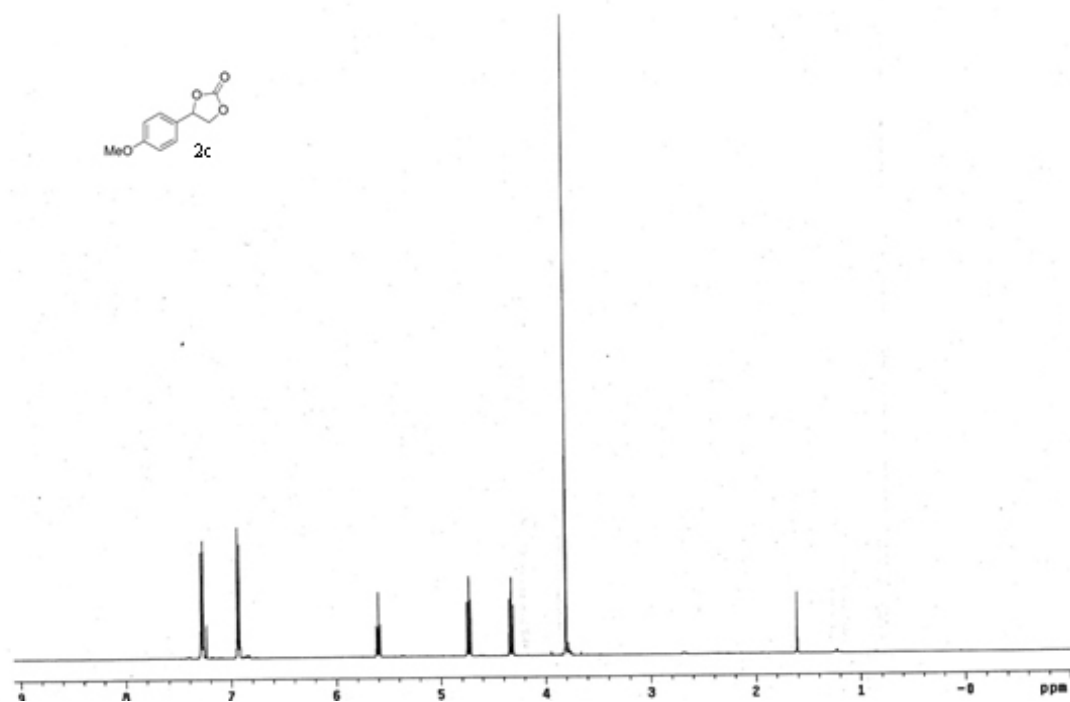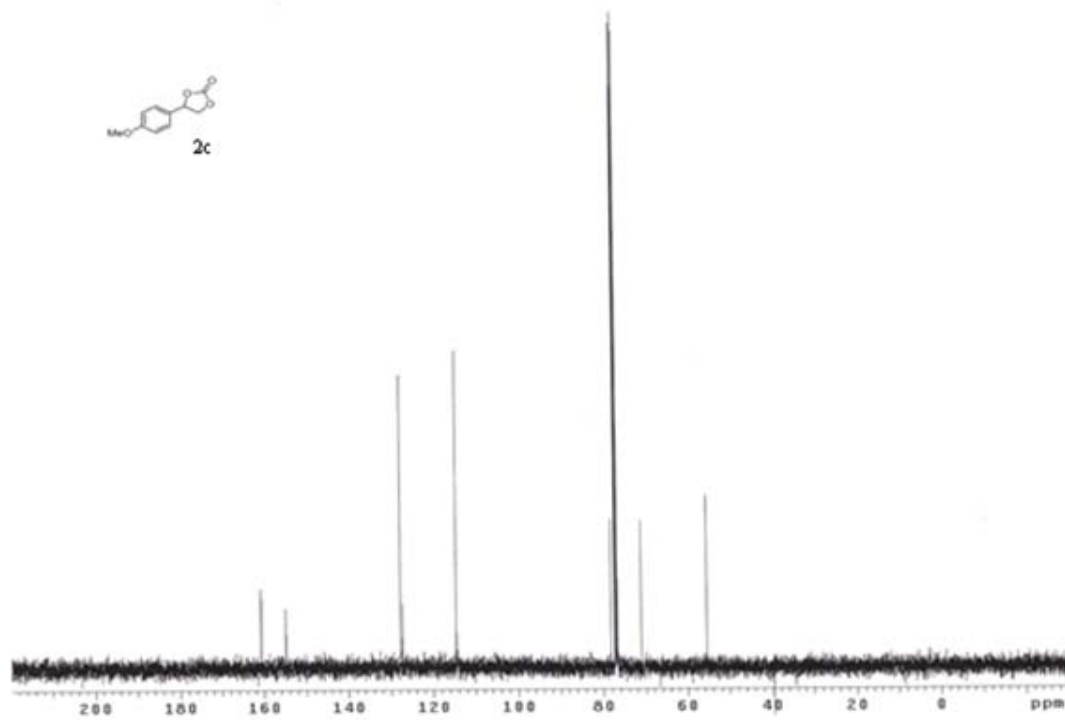



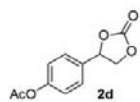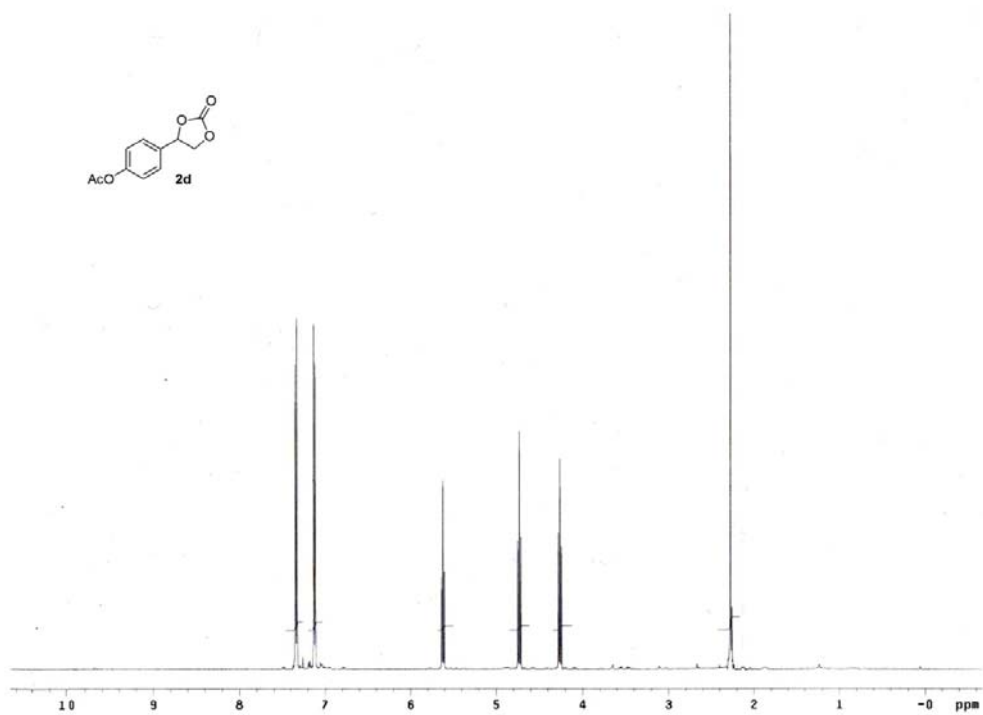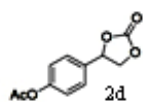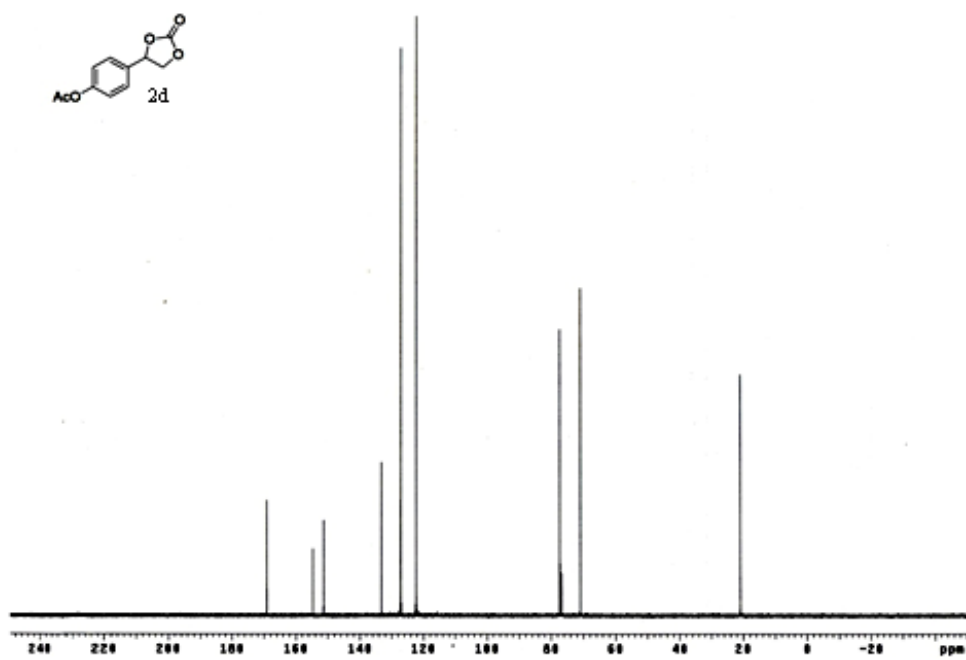

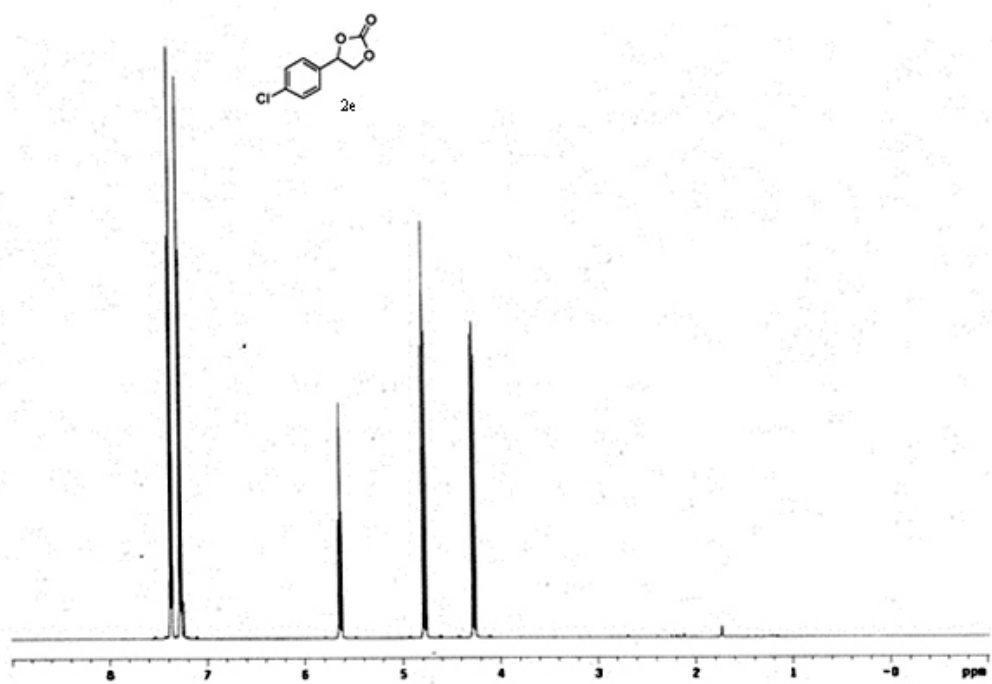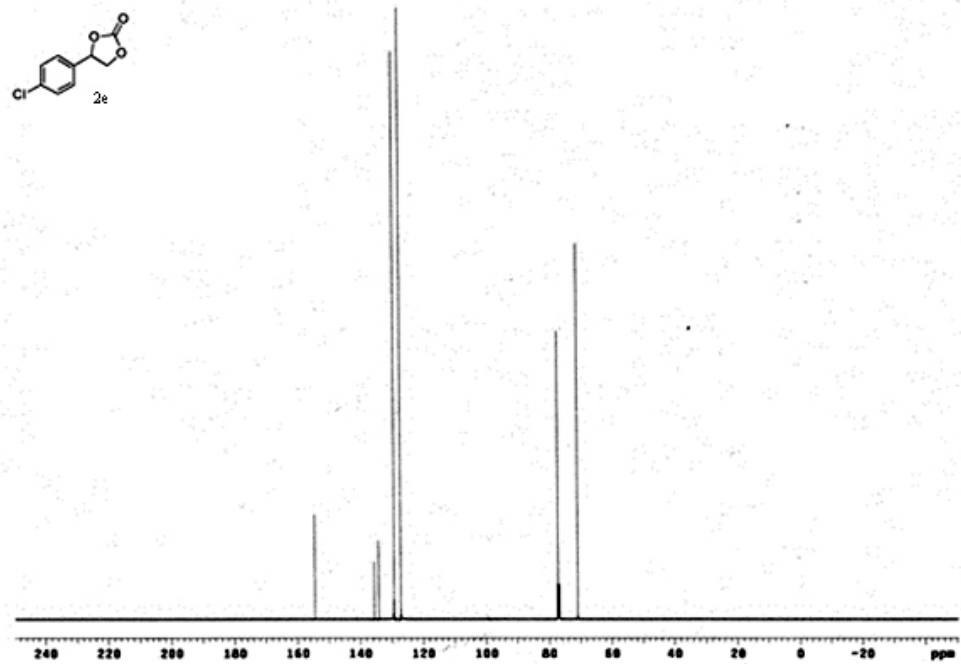

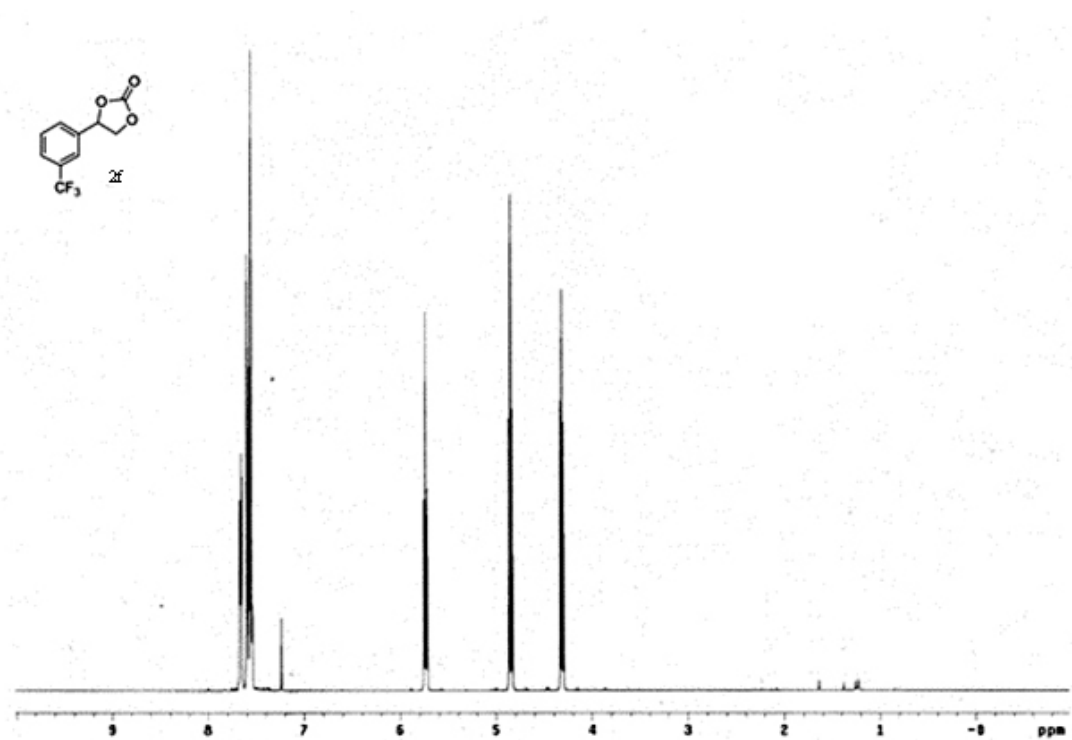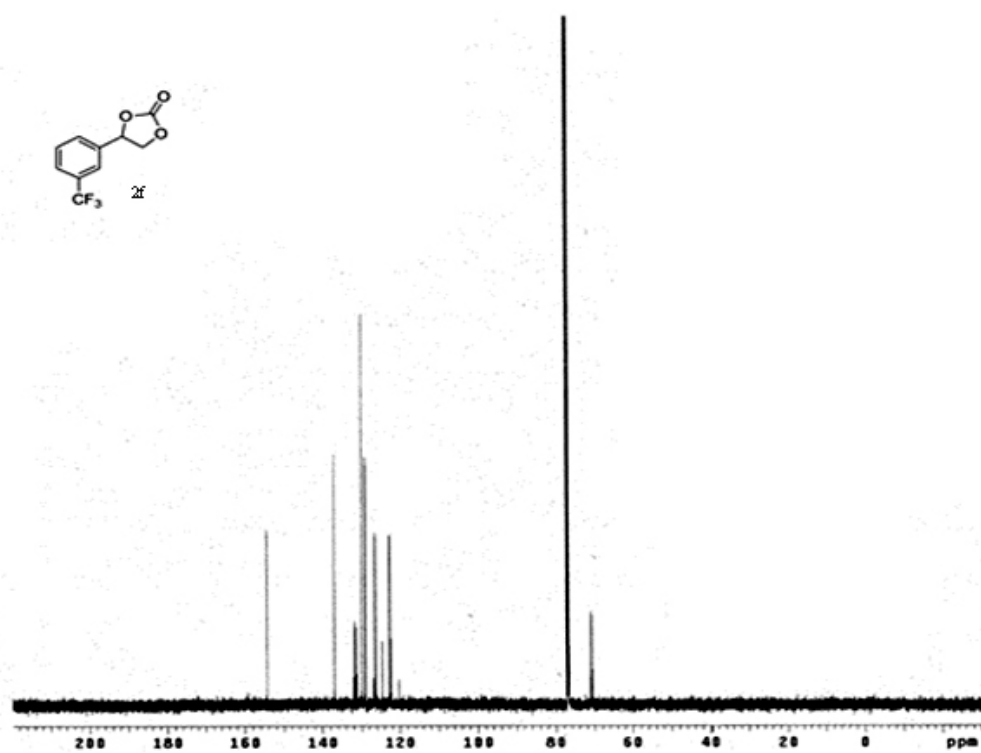

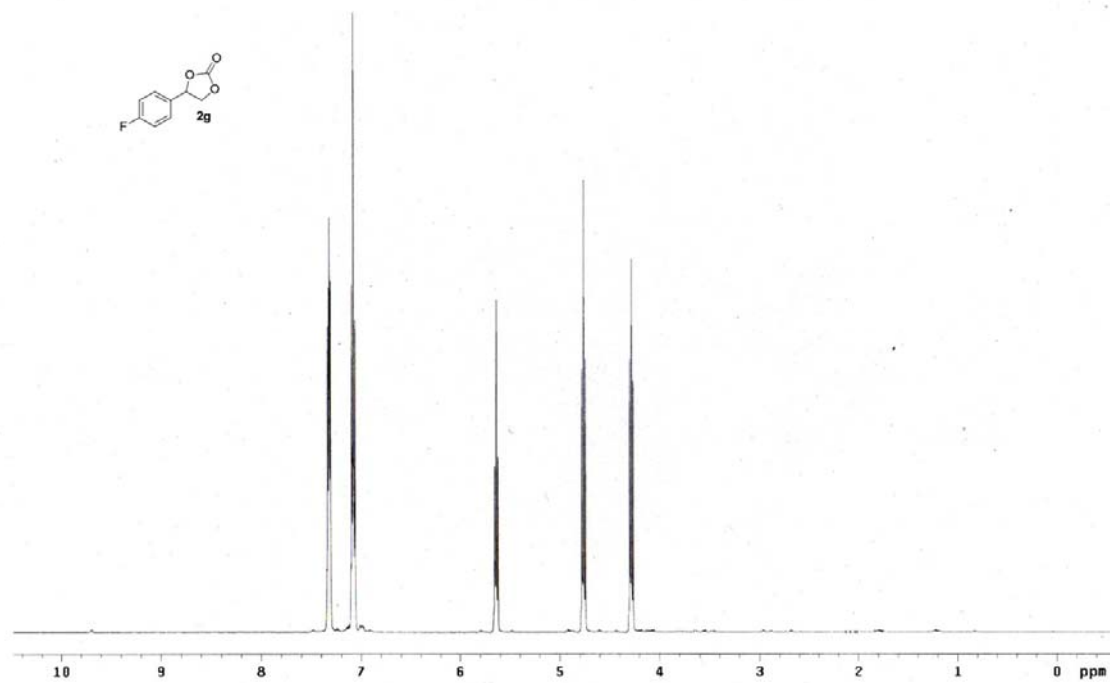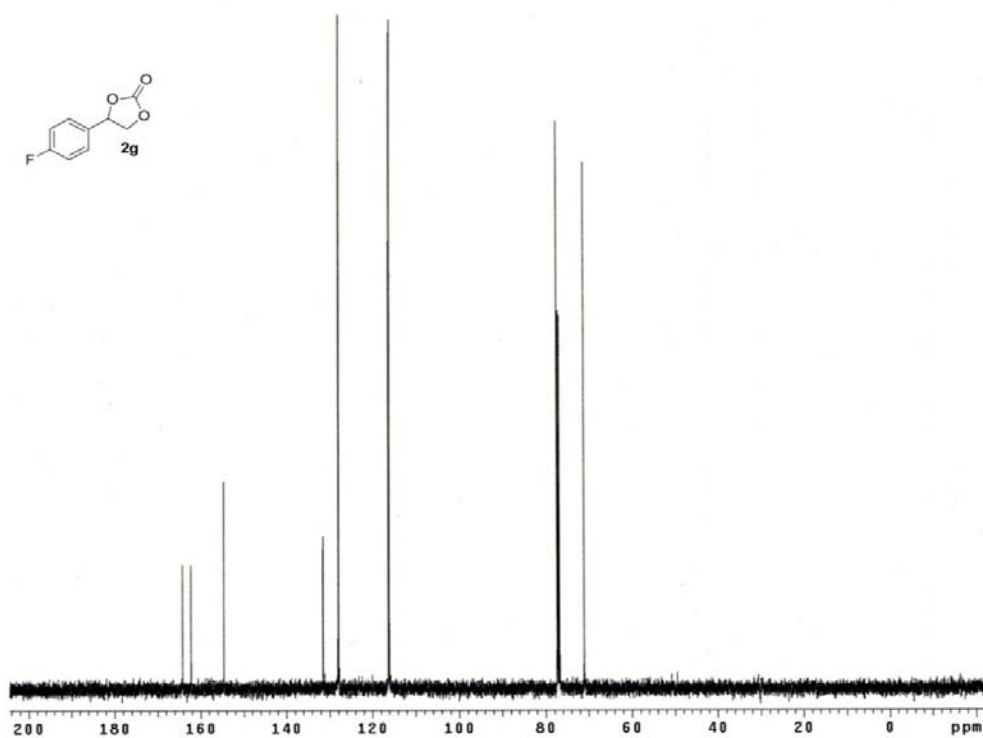



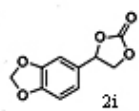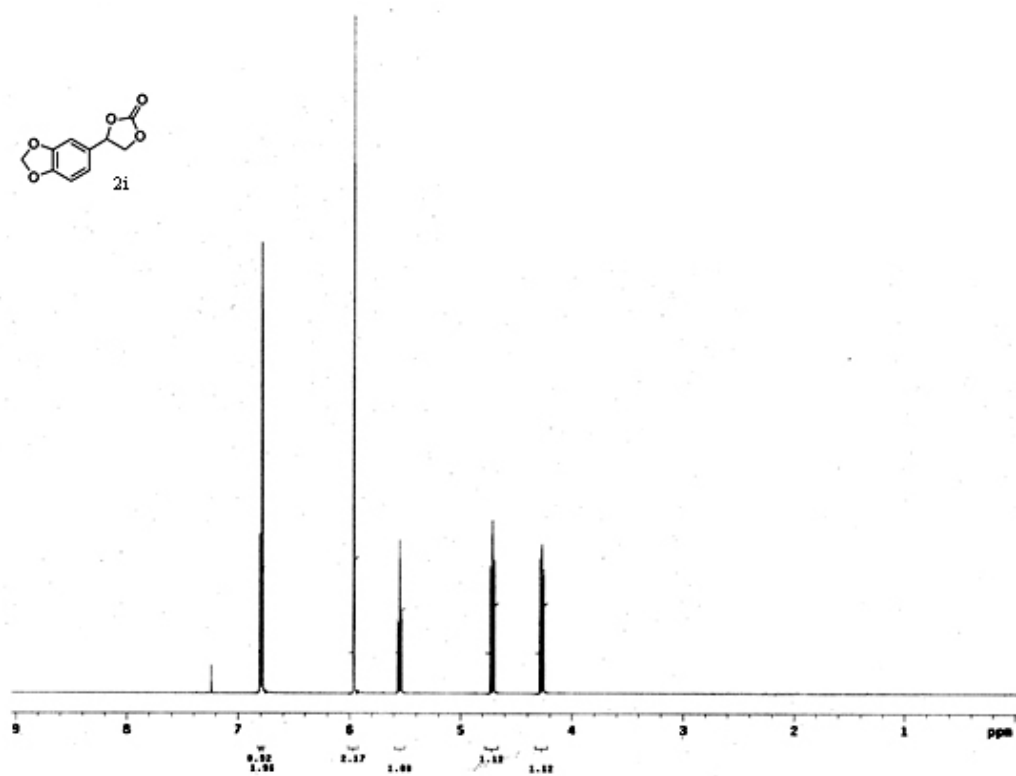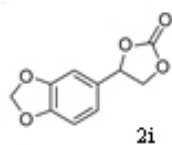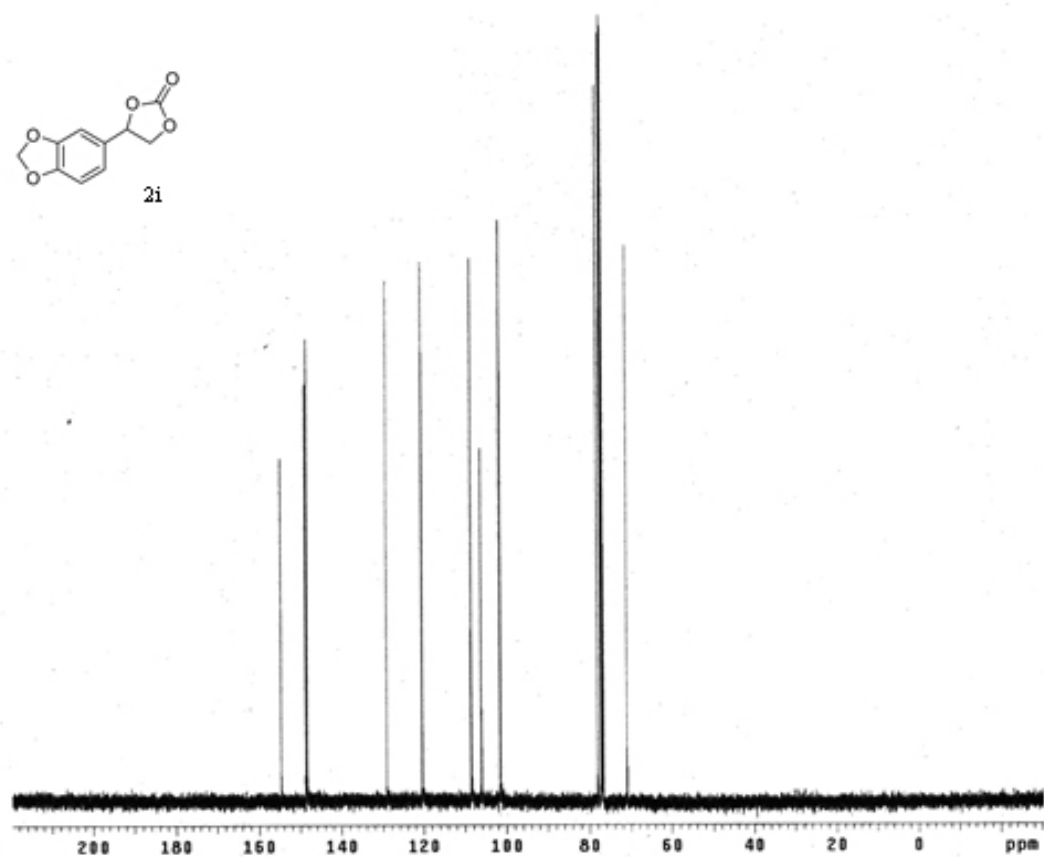

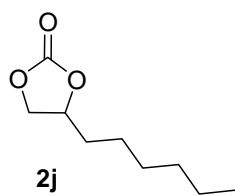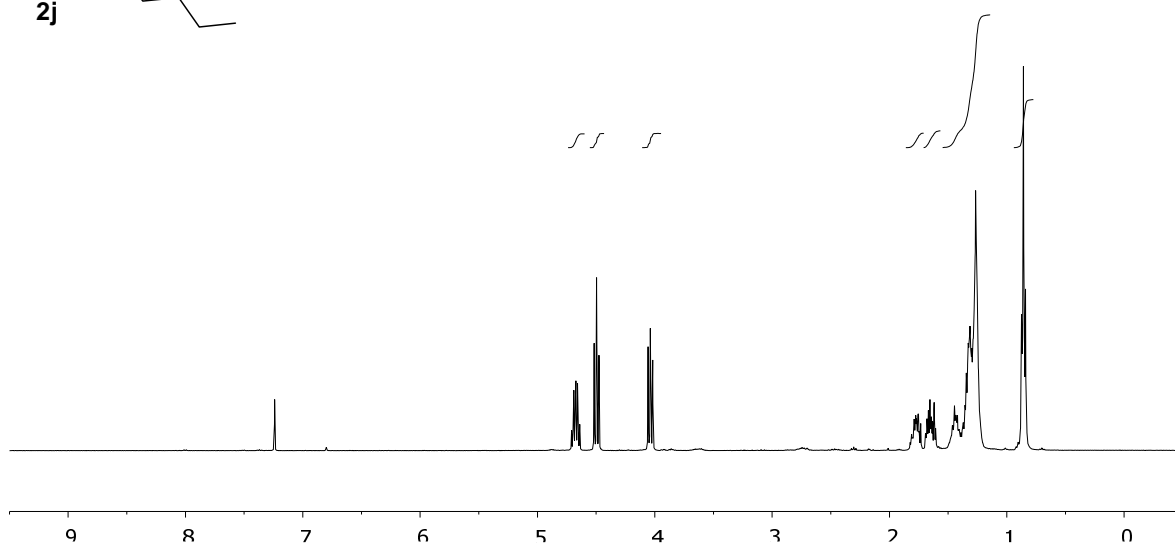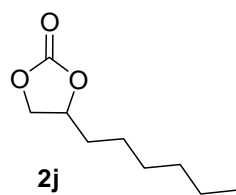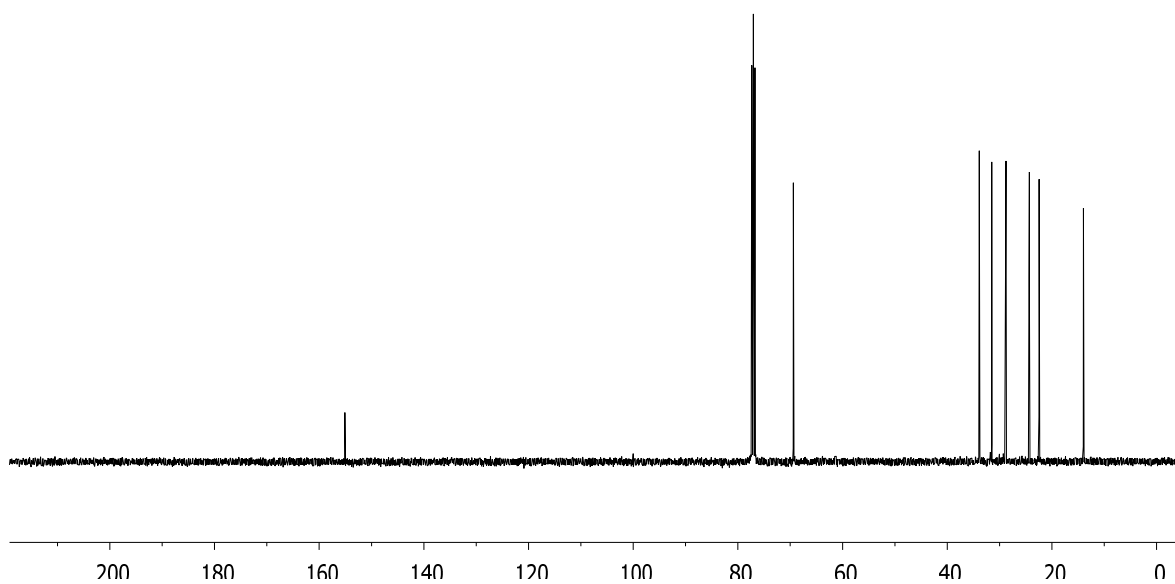

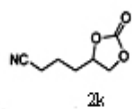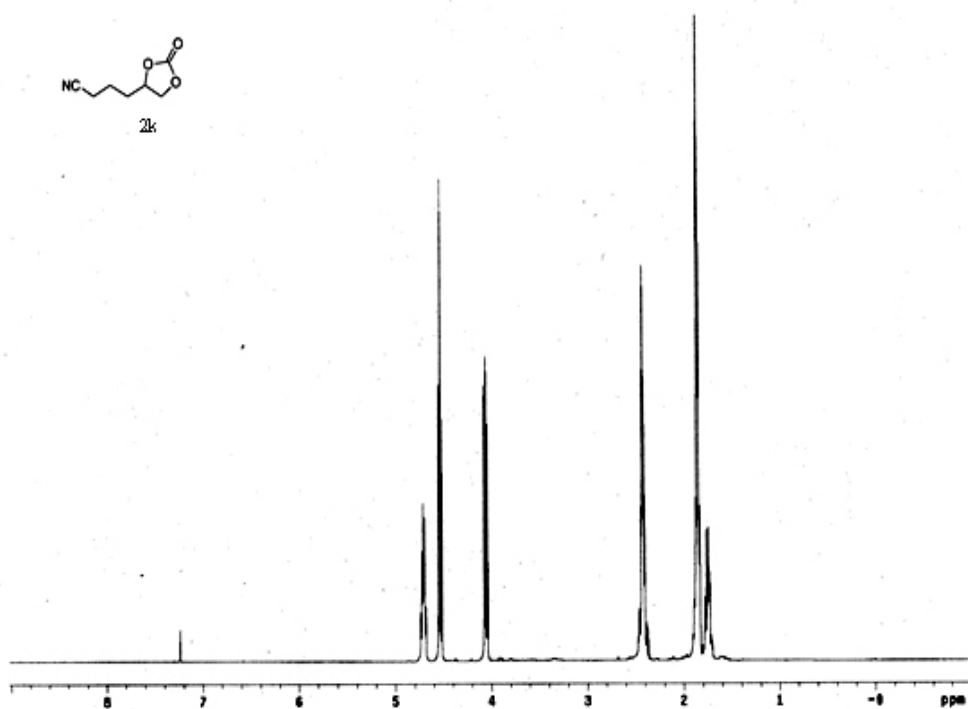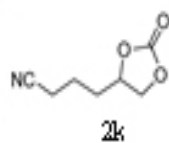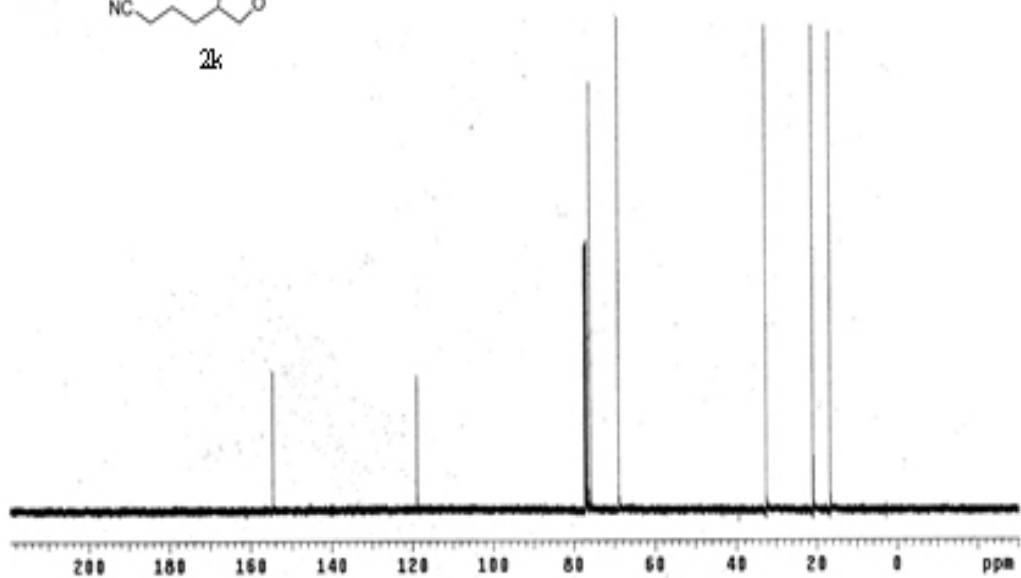



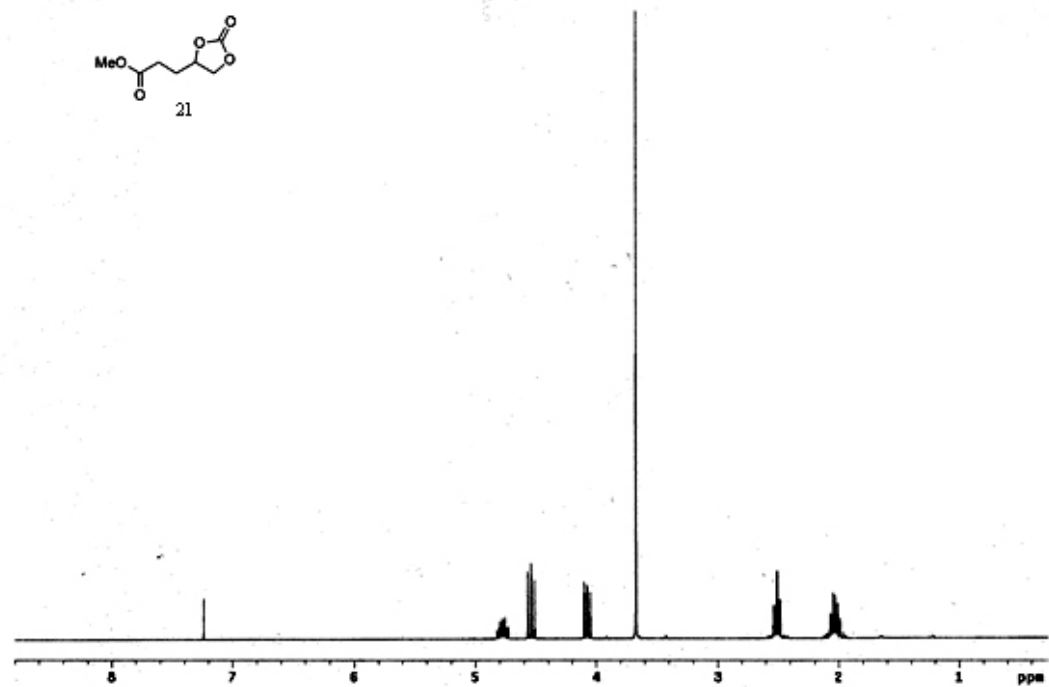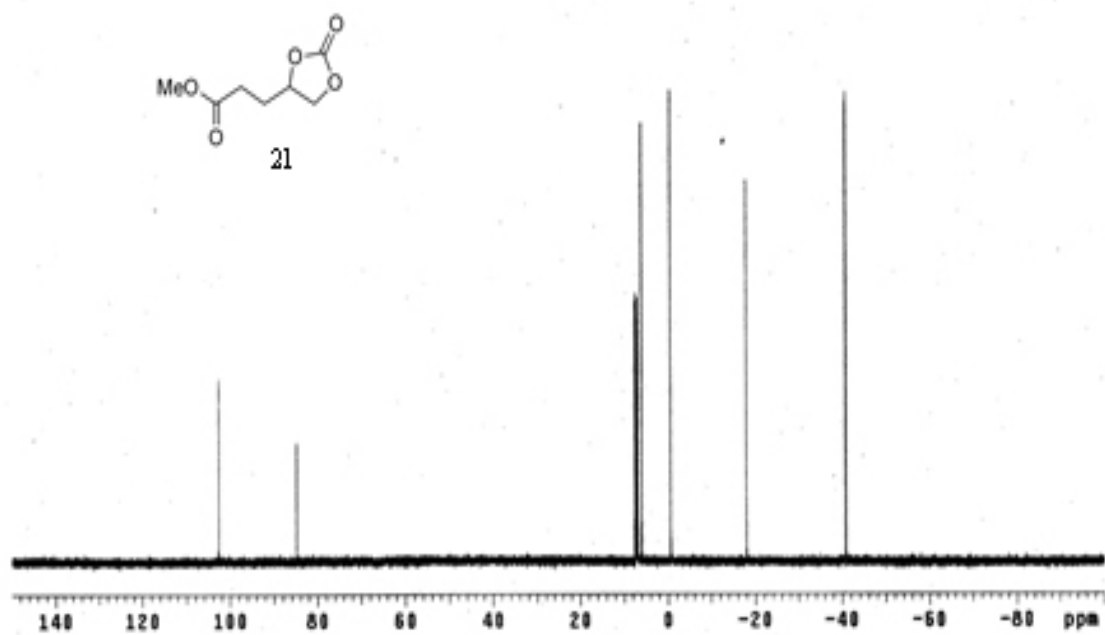

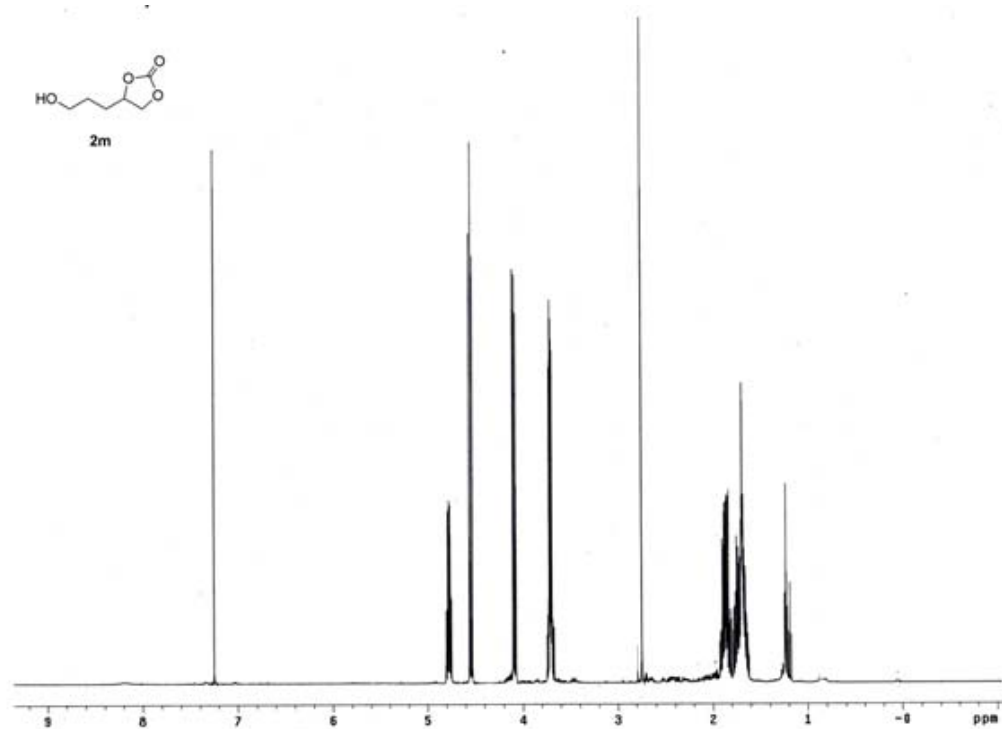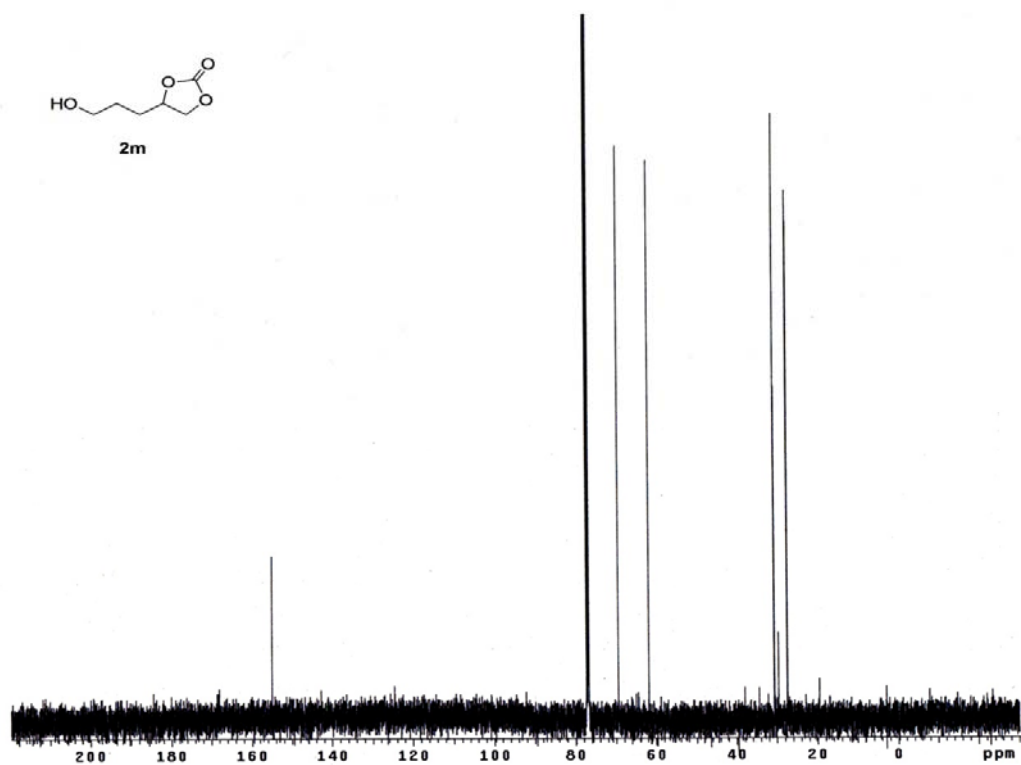

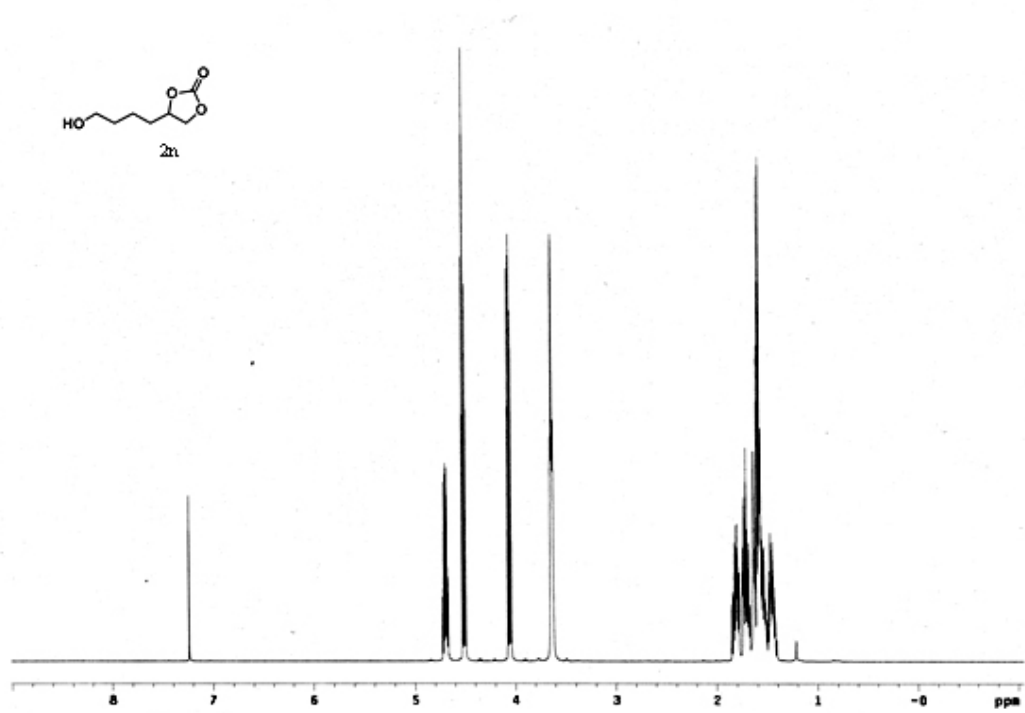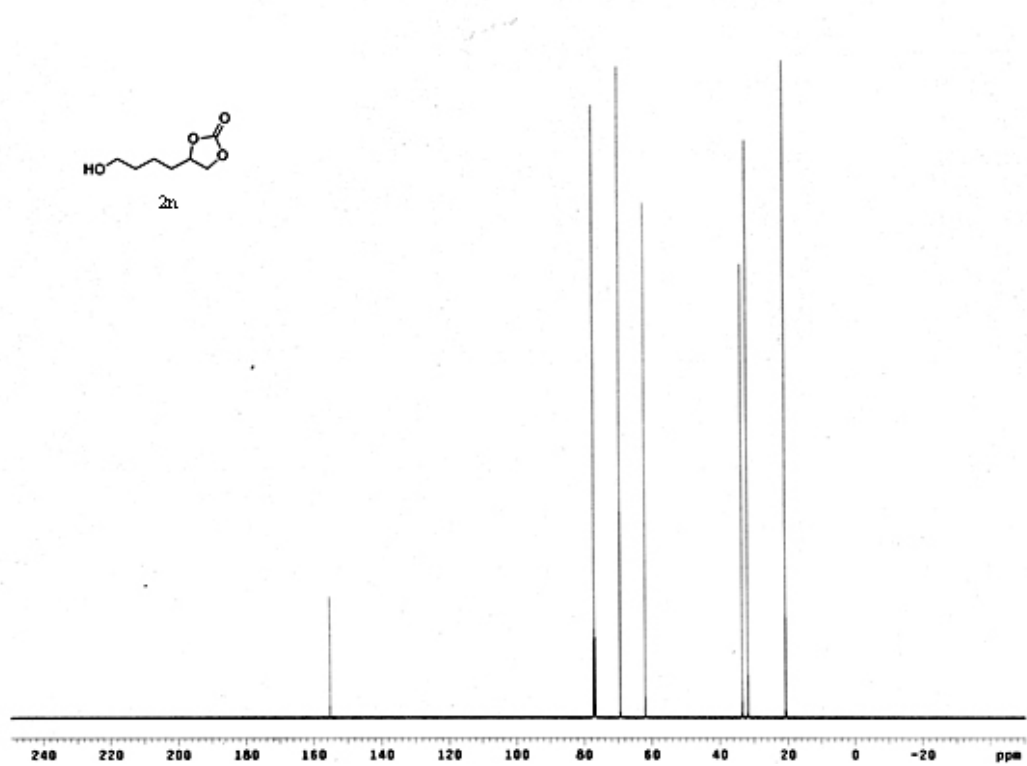

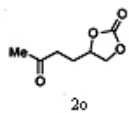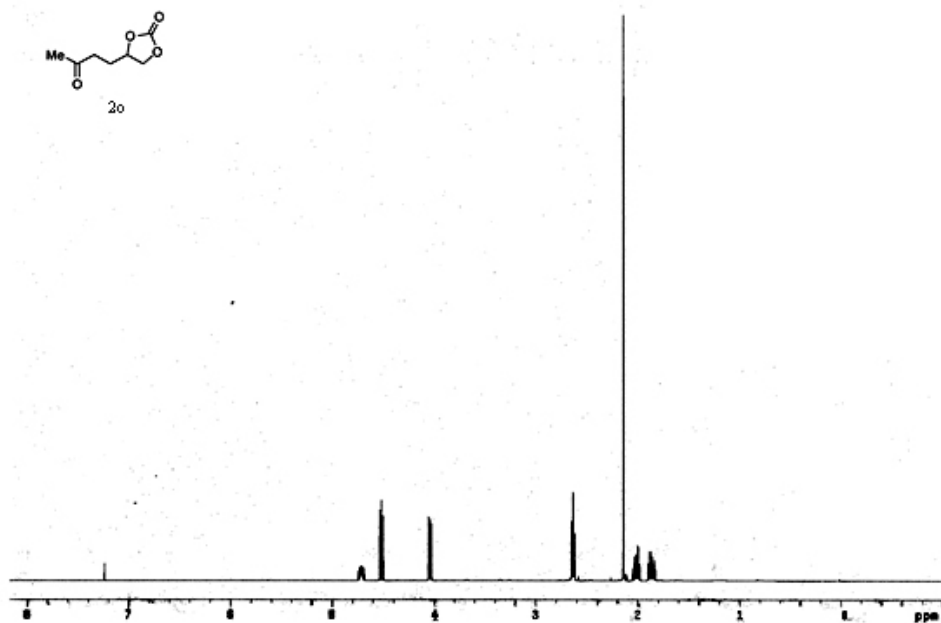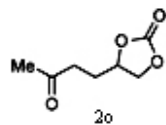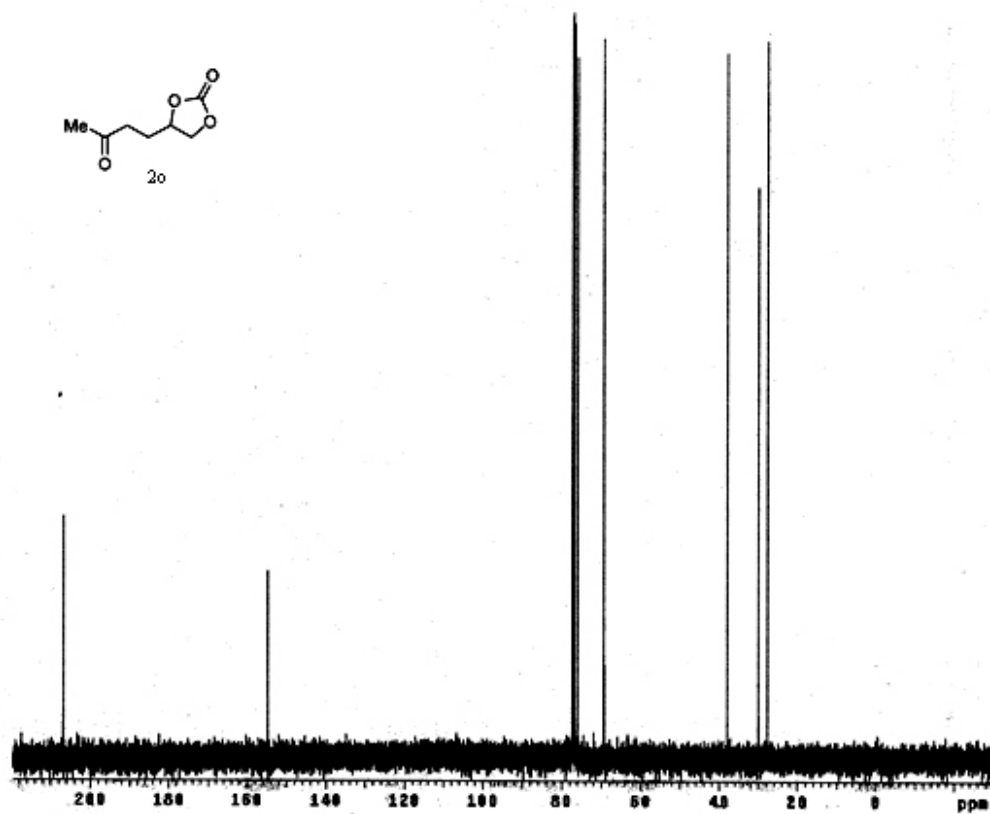

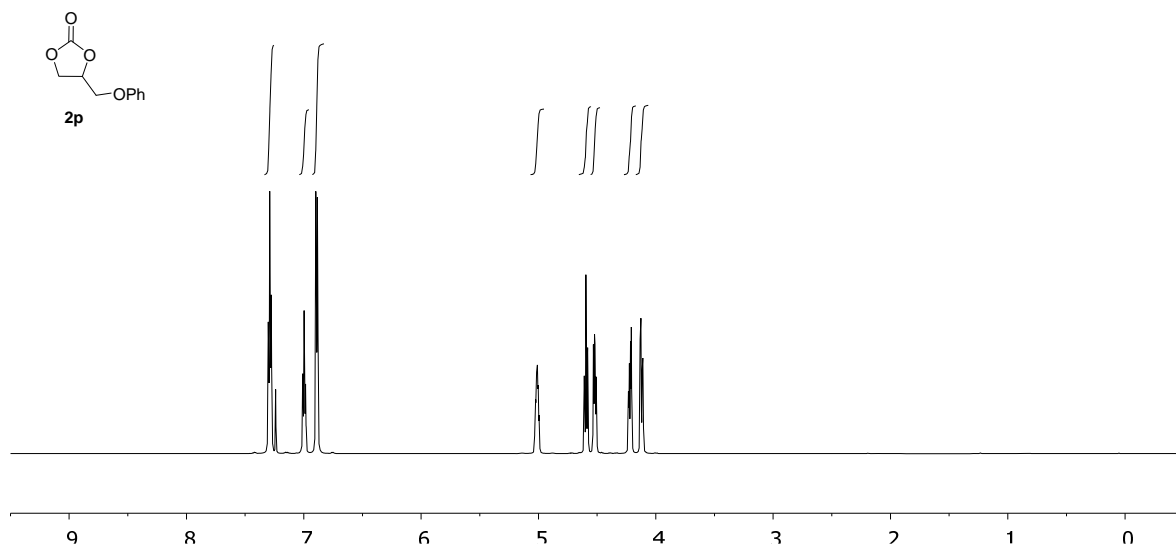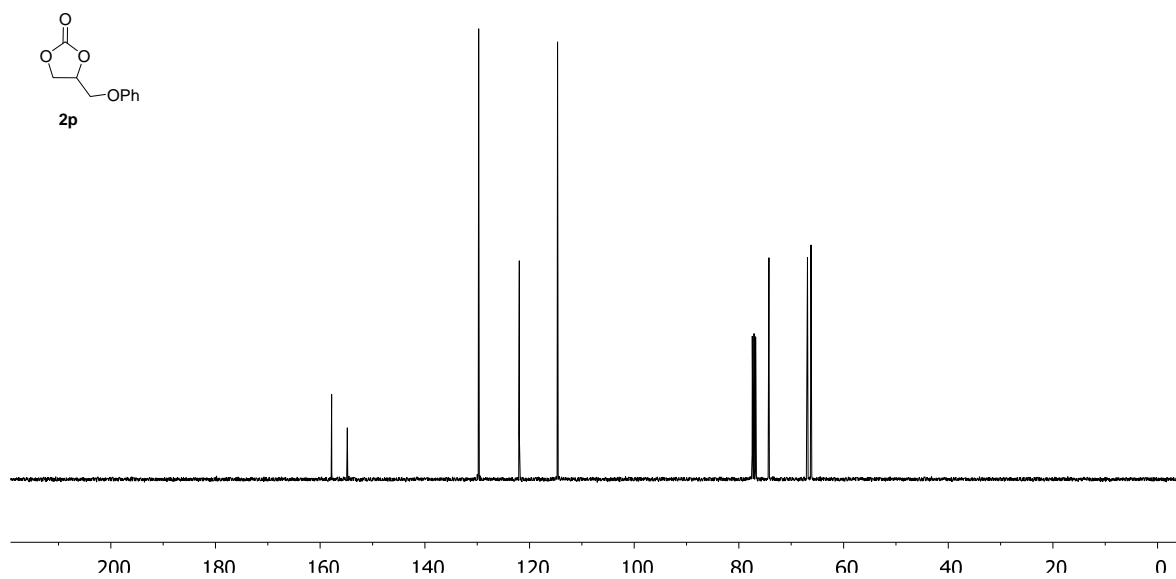

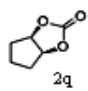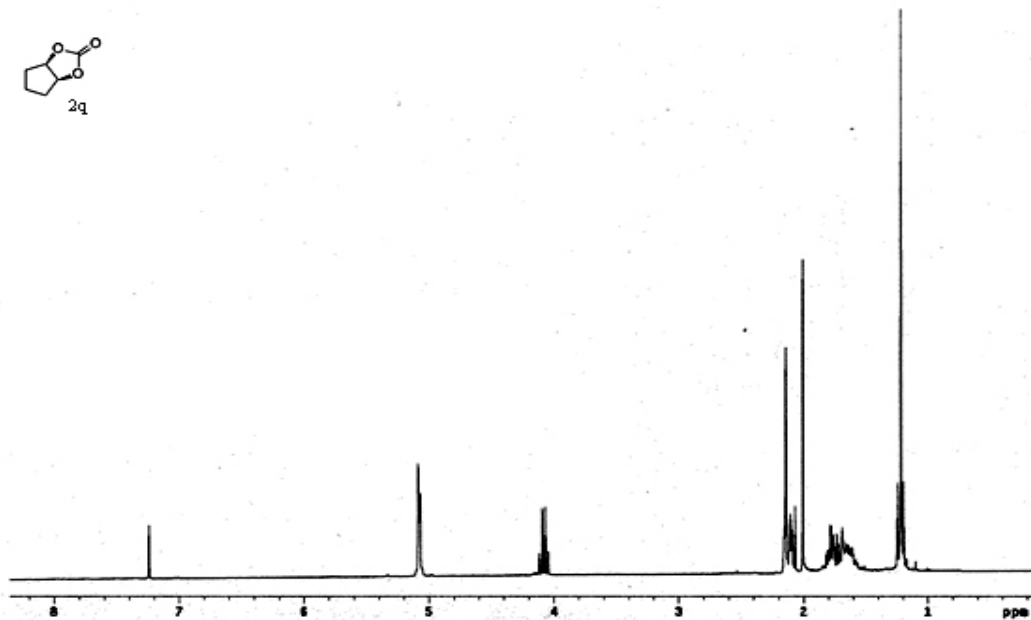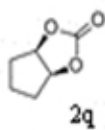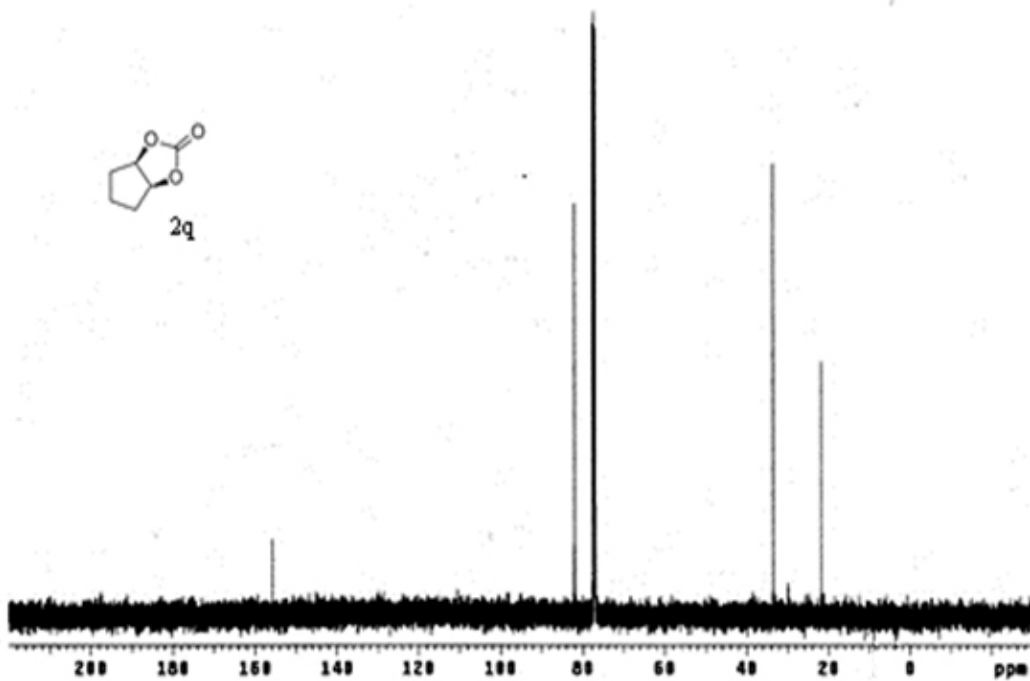

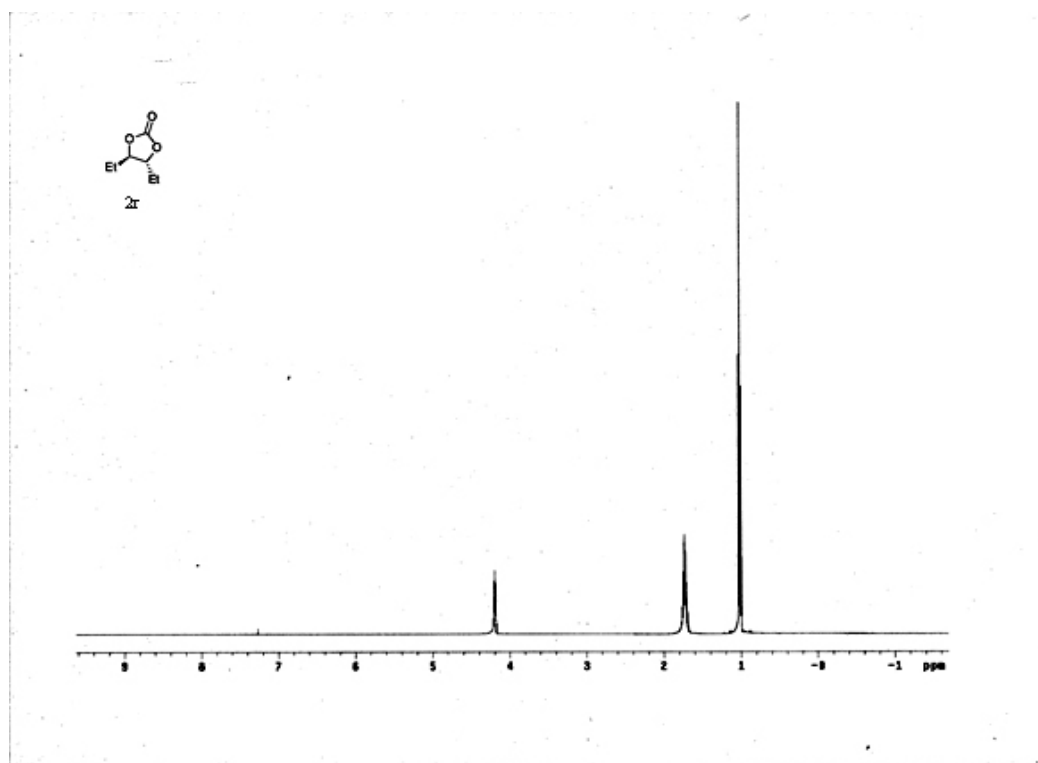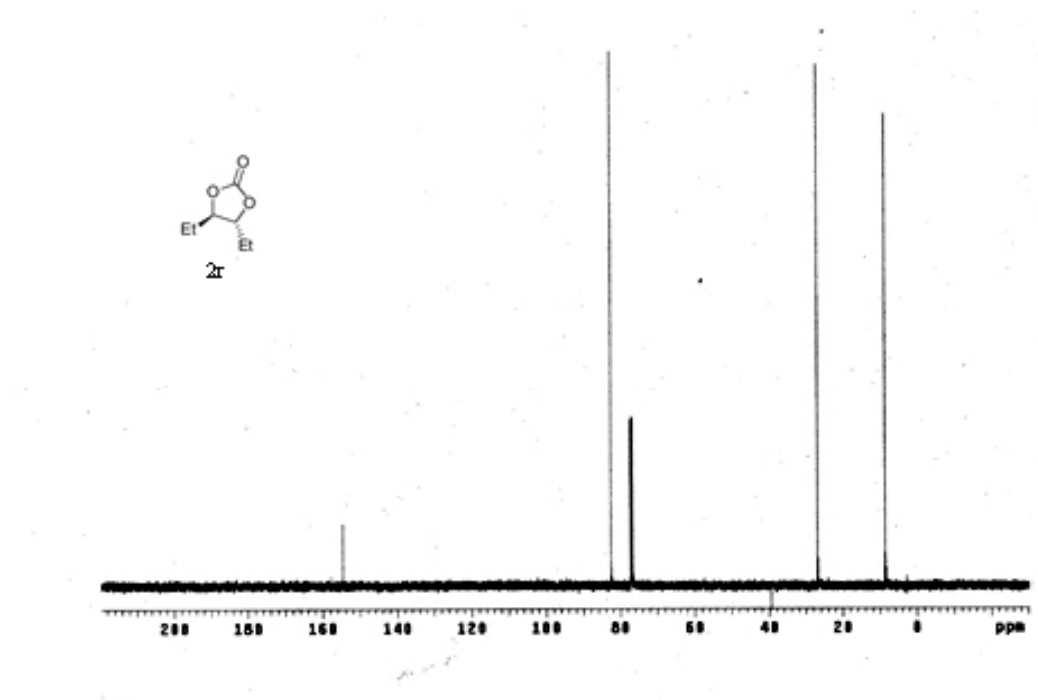

Supplement: c4cc00252k1.pdf [file c4cc00252k1.pdf]
